# Supplementary material for: Chromosome-scale assembly and analysis of biomass crop Miscanthus lutarioriparius genome
Source: PubMed Central journal article supplement (PMC8080599; doi:10.1038/s41467-021-22738-4), 2021-04-28
Supplement: 41467_2021_22738_MOESM1_ESM.pdf [file 41467_2021_22738_MOESM1_ESM.pdf]

**Chromosome-scale assembly and analysis of biomass crop  
*Miscanthus lutarioriparius* genome**

Miao and Feng *et al.*

# Kmer distribution

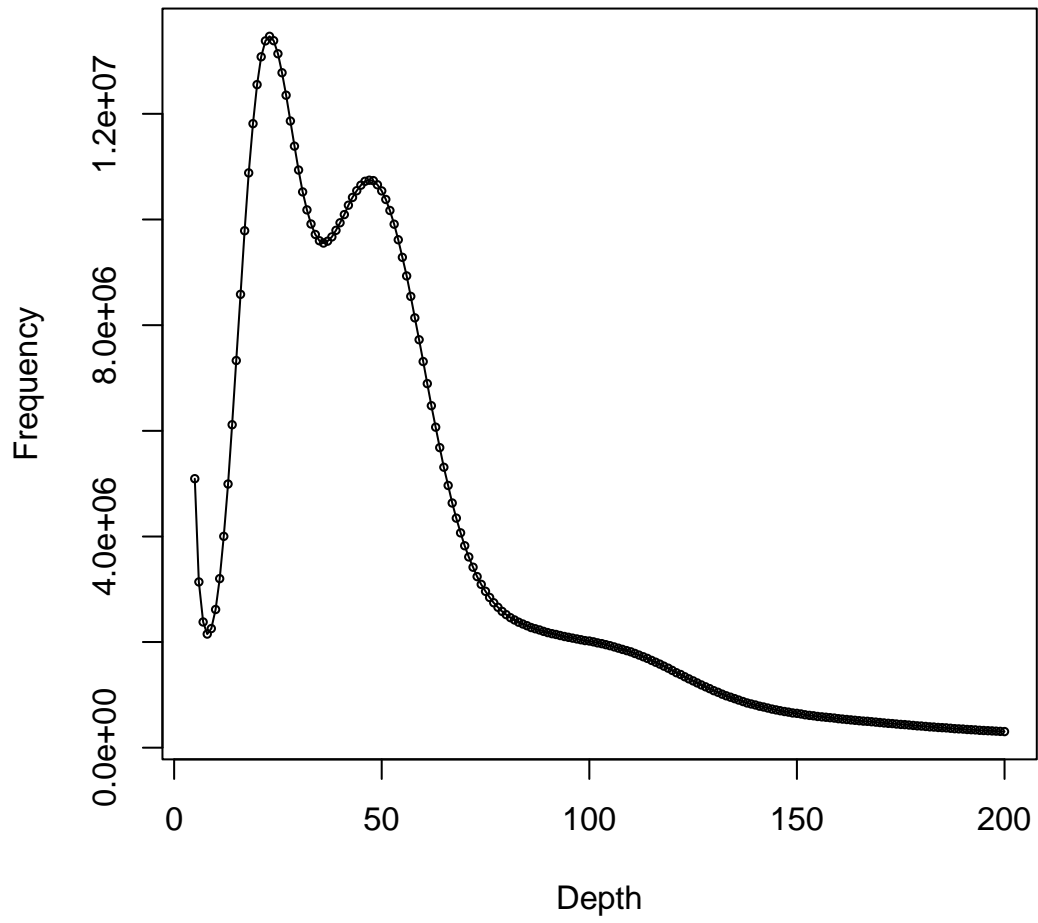

Supplementary Fig. 1. The 17-mer frequency distribution using NGS short reads.

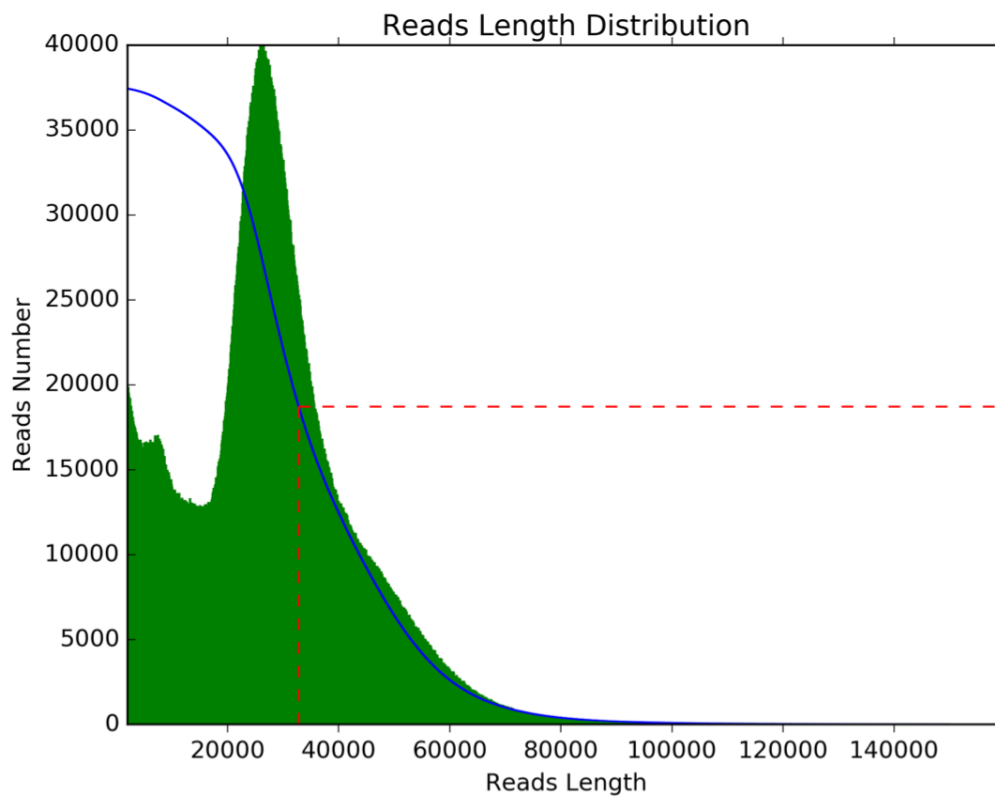

**Supplementary Fig. 2. The length distribution of filtered Oxford Nanopore reads.**

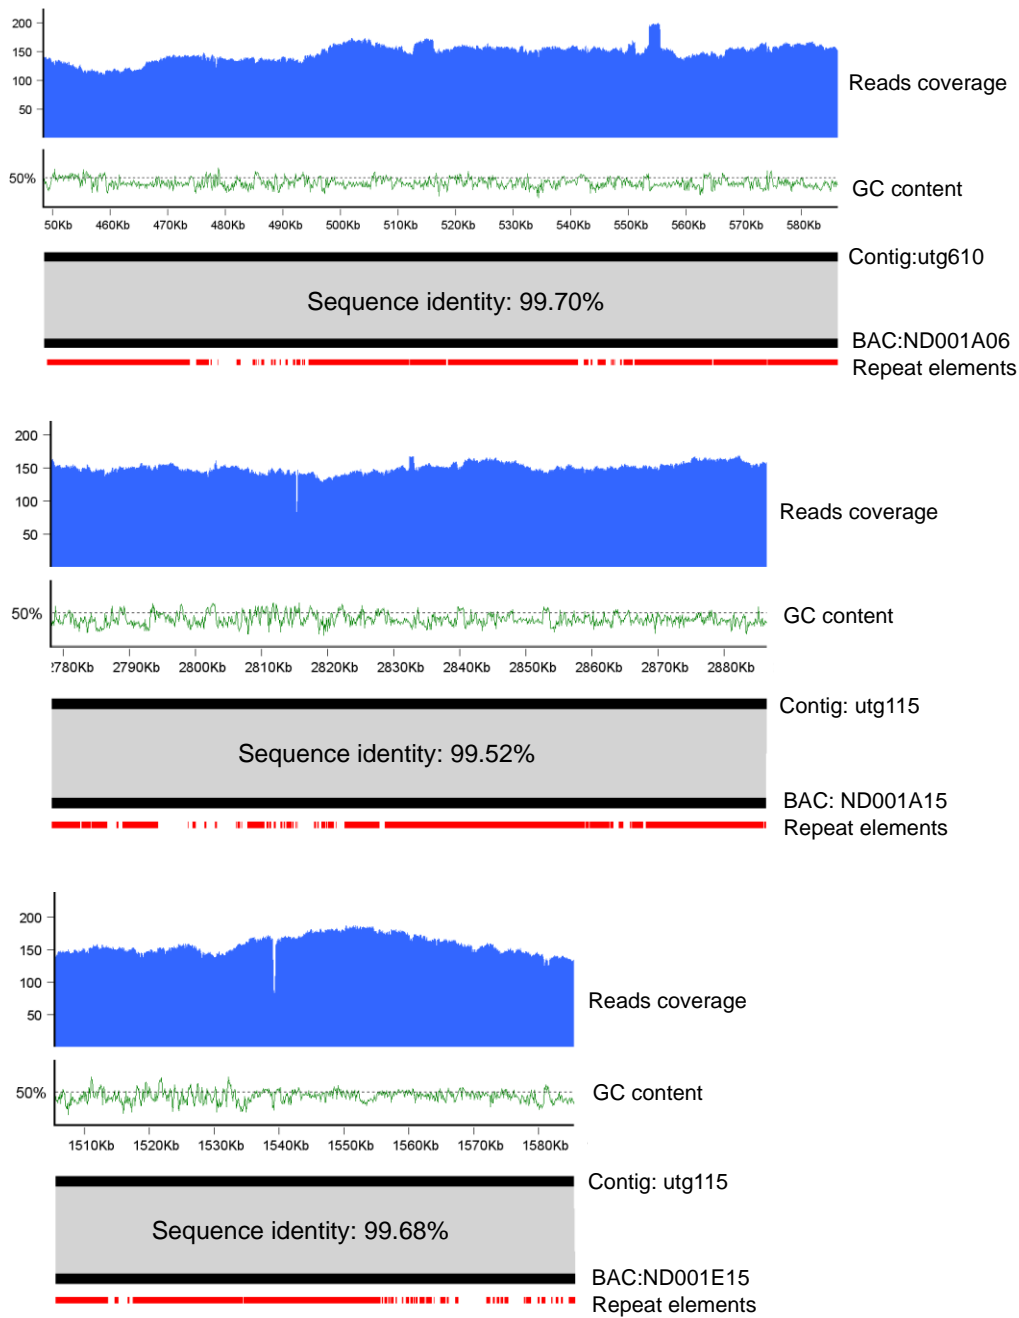

**Supplementary Fig. 3. Sequence comparison between Nanopore contigs and BAC sequences of *M. lutarioriparius*.** Reads coverage was calculated by mapping the filtered Oxford Nanopore reads against the polished contigs of *M. lutarioriparius* and using a 100 bp window size. GC content was calculated using a 100 bp window size. The repeat elements of BAC sequences were identified using RepeatMasker with *Miscanthus* specific repeats database generated in present study. The sequence comparisons were performed by MUMer 3.2 software. The sequence identity was calculated using the results generated by MUMer 3.2 software.

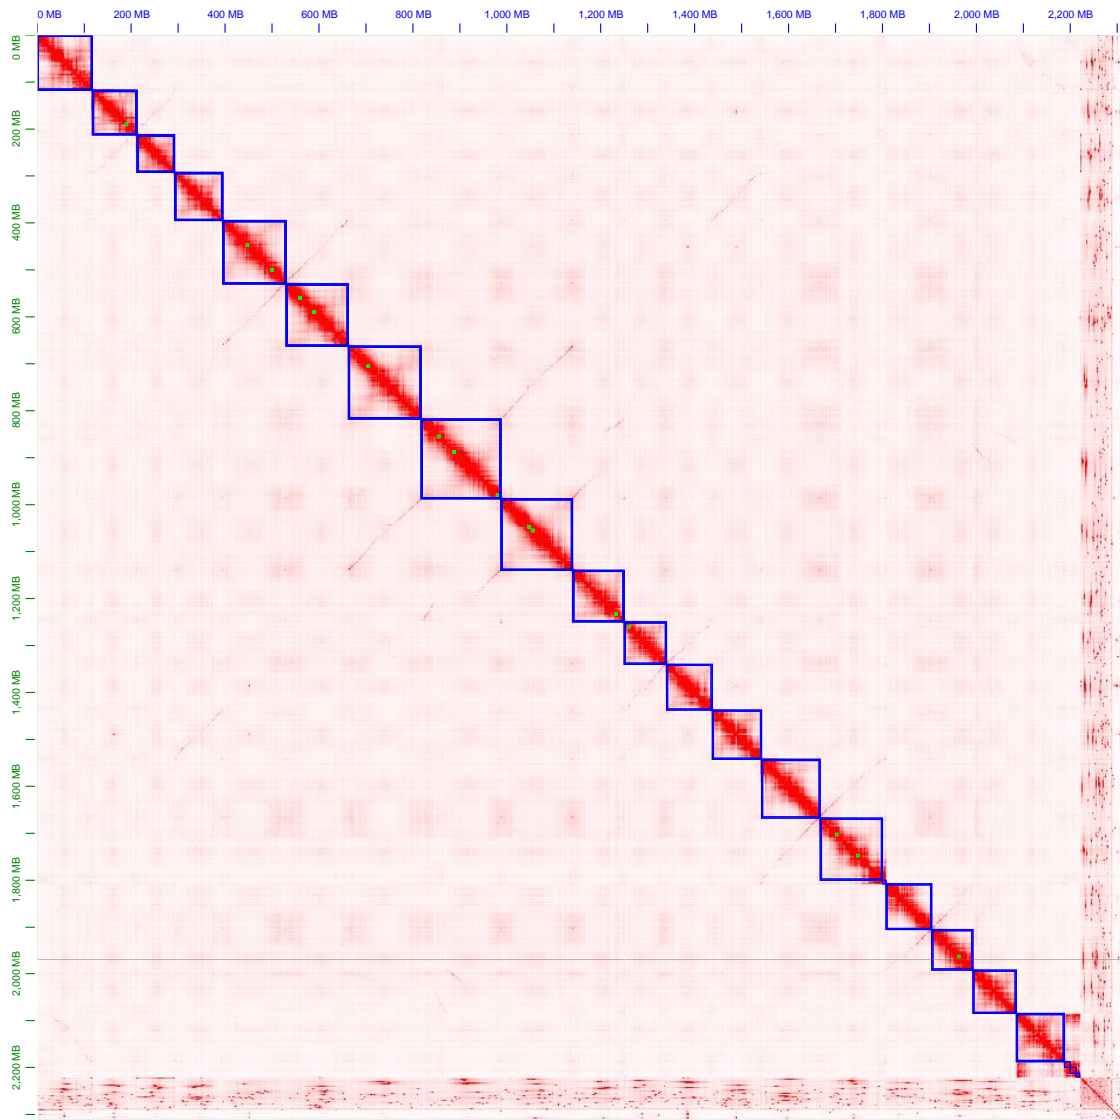

**Supplementary Fig. 4. Interaction frequency distribution of Hi-C links among chromosomes.** The Hi-C version of *M. lutarioriparius* genome assembly generated by 3d-dna pipeline.

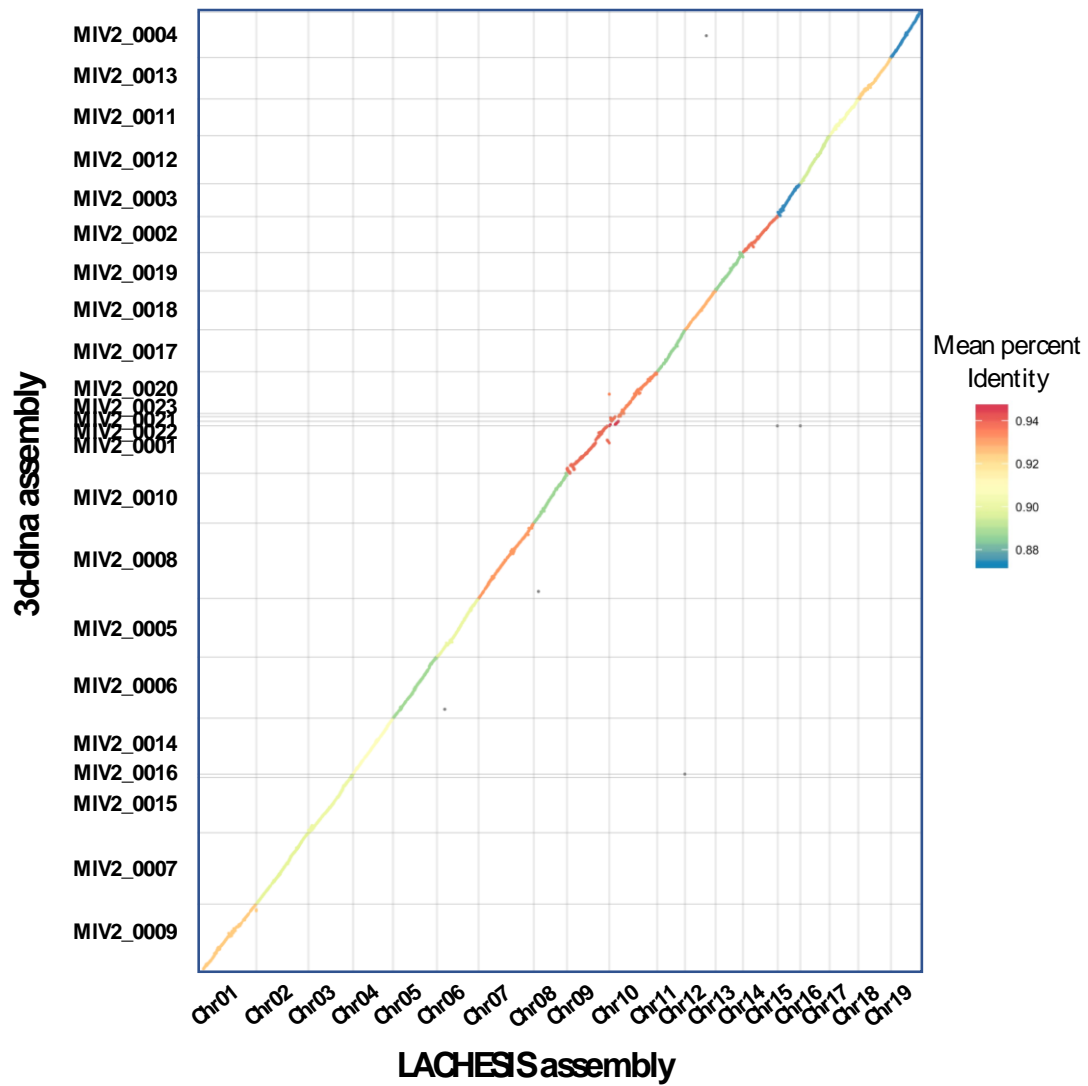

**Supplementary Fig. 5. Comparison of sequences identity of chromosome anchoring results generated by LACHESIS and 3d-dna software.** The whole genome sequence comparison was performed using minmap2 (version 2.16) software.

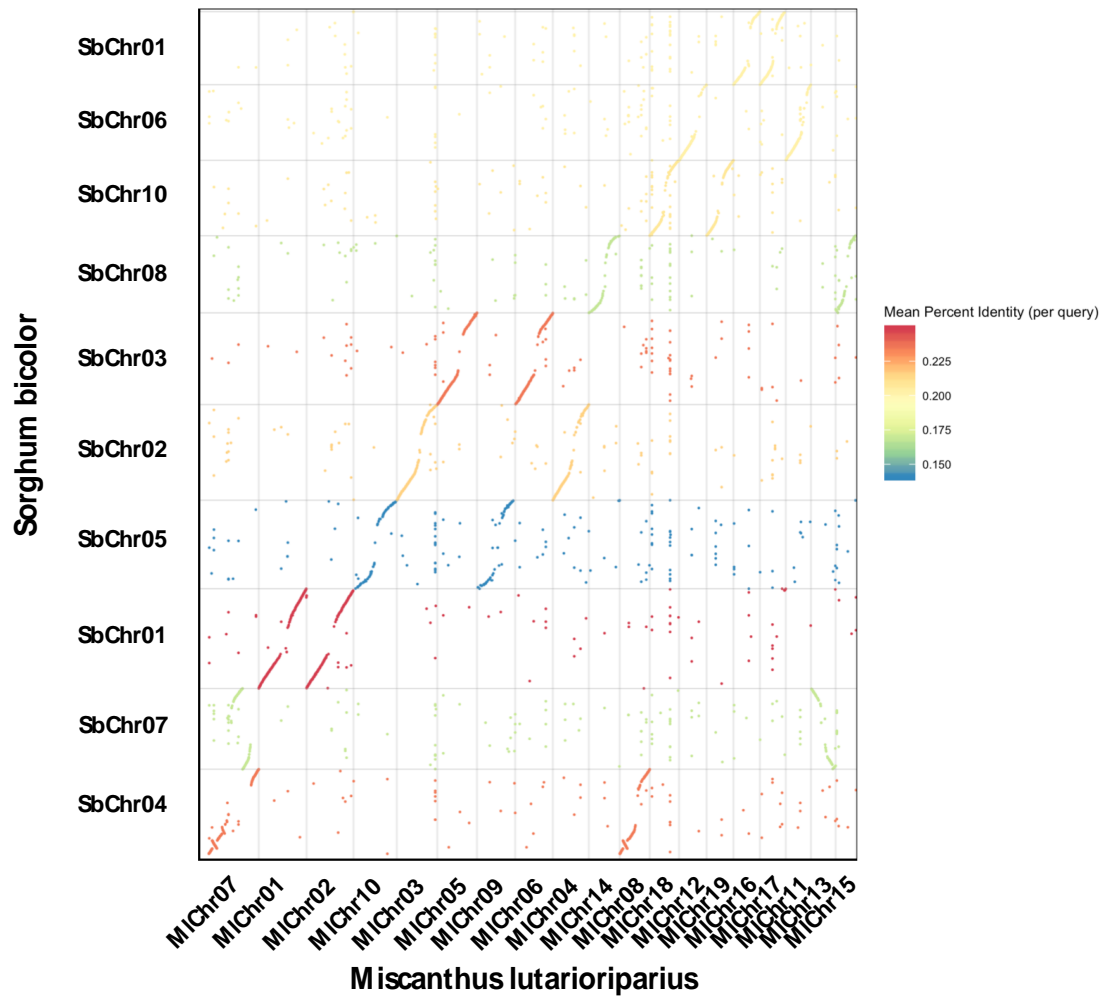

**Supplementary Fig. 6. Comparison of whole genome sequence similarity between *M. lutarioriparius* LACHESIS genome assembly (final genome assembly) and sorghum genome. The sequence comparison was performed using minmap2 (version 2.16) software.**

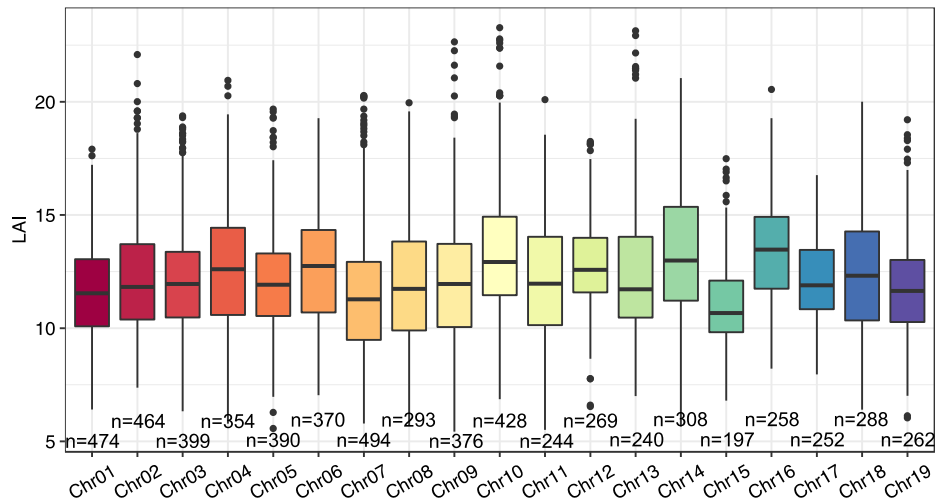

**Supplementary Fig. 7. Boxplot of LTR Assembly Index (LAI) for 19 chromosomes.** In each boxplot, the center line indicates the median, the lower and upper hinges represent the first and third quartiles, the upper whisker extends to the largest value less than 1.5× the interquartile range (IQR), the lower whisker extends to the smallest value at most 1.5× the IQR, the black point represent outlier. The number of data points used for plotting is shown at the bottom.

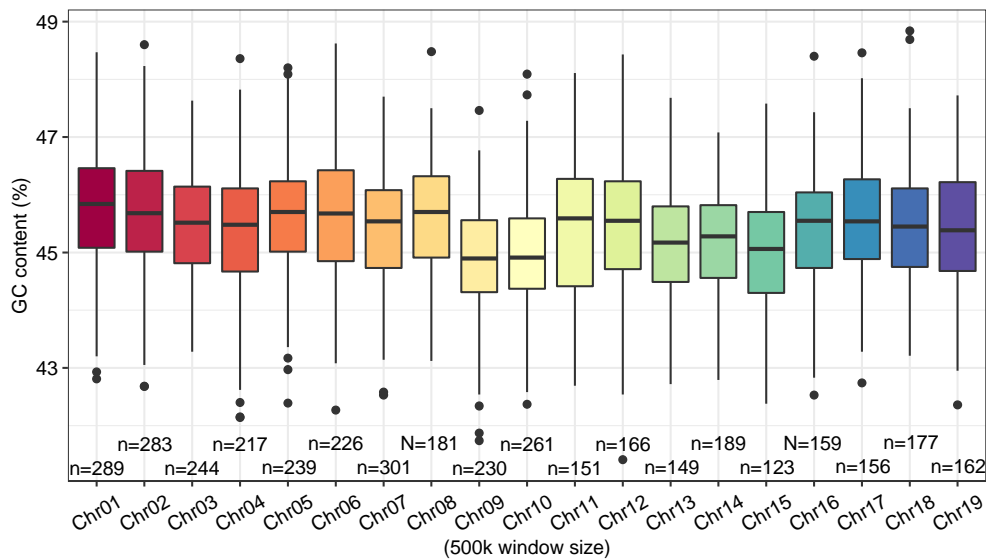

**Supplementary Fig. 8. GC content of each chromosome of *M. lutarioriparius*.** In each boxplot, the center line indicates the median, the lower and upper hinges represent the first and third quartiles, the upper whisker extends to the largest value less than 1.5× the interquartile range (IQR), the lower whisker extends to the smallest value at most 1.5× the IQR, the larger black points represent outliers. The data points are indicated with smaller black points. The number of data points used for plotting is shown at the bottom.



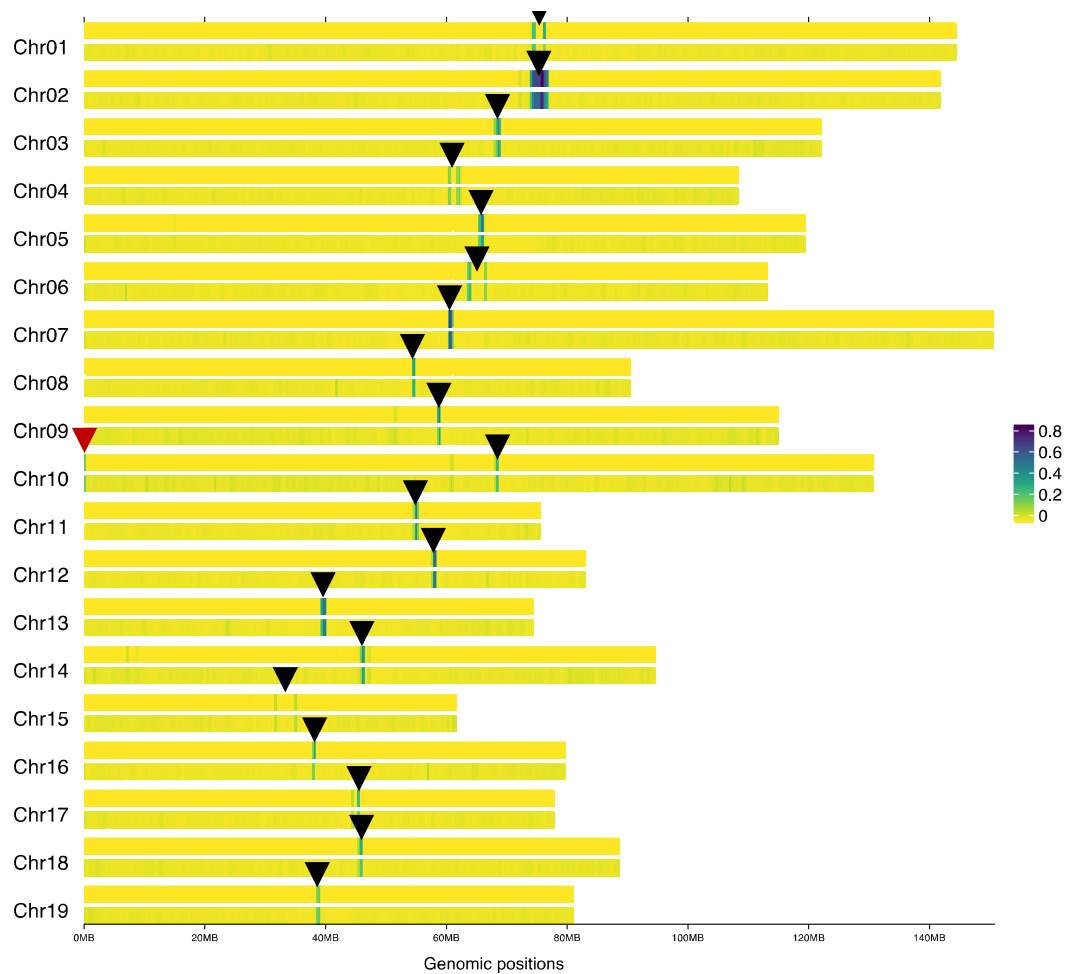

**Supplementary Fig. 9. Potential centromere and telomere position of *M. lutarioriparius* genome.** The heatmap tracks for each chromosome represent the density of tandem repeats (non-overlap window size = 500 kb) identified by Tandem Repeat Finder (upper track) and the simple sequence repeats identified by RepeatMasker (lower track). Black and red inverted triangles were used to indicate the potential locations of centromere and telomere, respectively.

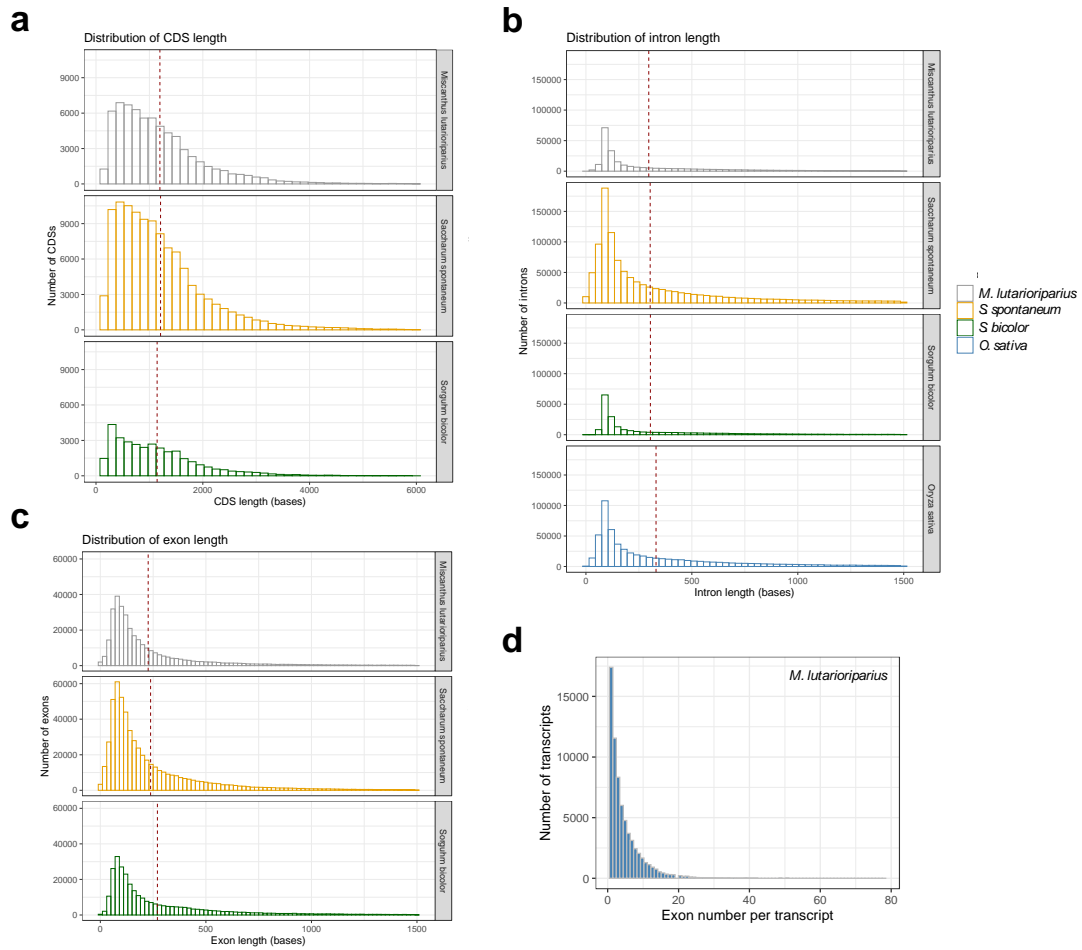

**Supplementary Fig. 10. Statistic of gene prediction.** The length distribution of protein-coding sequence (CDS) (a), intron (b) and exon (c) of *M. lutarioriparius*, *S. spontaneum* and *S. bicolor*. d the exon number distribution of *M. lutarioriparius*.

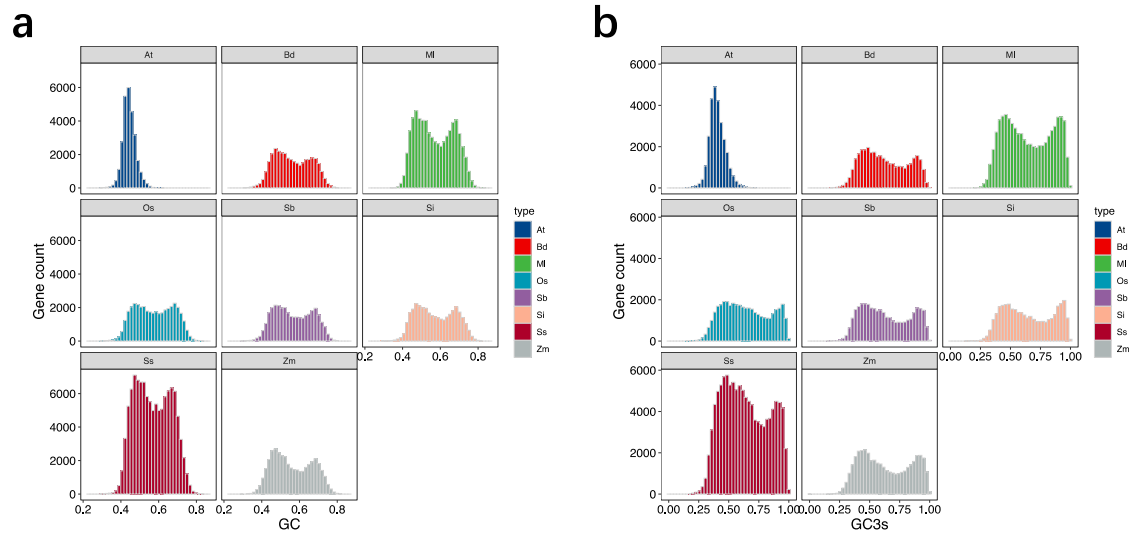

**Supplementary Fig. 11. Comparison of GC content distribution (a) and GC3s content distribution (b) of whole genome coding sequences (CDS) for 8 species. At: *Arabidopsis thaliana*. Bd: *Brachypodium distachyon*. MI: *Miscanthus lutarioriparius*. Os: *Oryza sativa*. Sb: *Sorghum bicolor*. Si: *Seteria italica*. Ss: *Saccharum spontaneum*. Zm: *Zea mays***

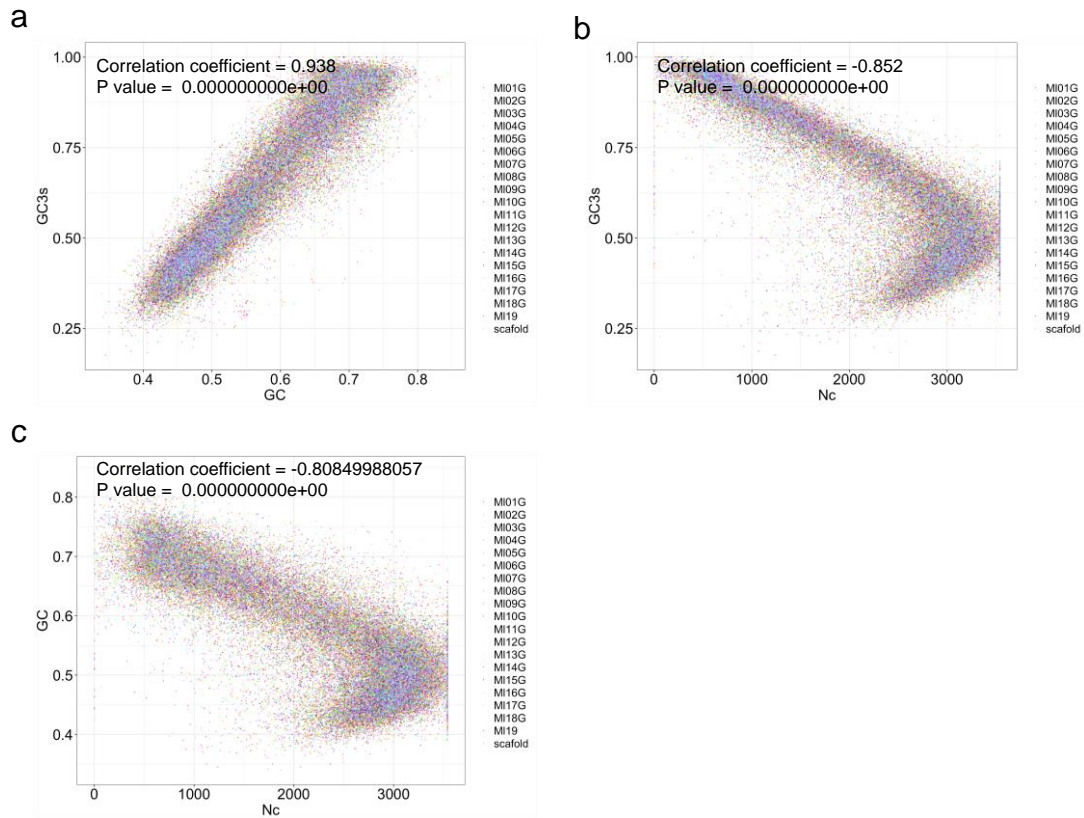

**Supplementary Fig. 12. The correlation analysis of GC3s, GC content and effective number of codons (Nc) for *M. lutarioriparius* protein-coding genes.** Pearson's rho rank correlation coefficient was computed using the R function rcorr within Hmisc package. The GC3s of *M. lutarioriparius* CDS has a strong positive correlation with GC content (a). The effective number of codons (Nc) of *M. lutarioriparius* CDS has negative correlation with GC and GC3s, respectively.

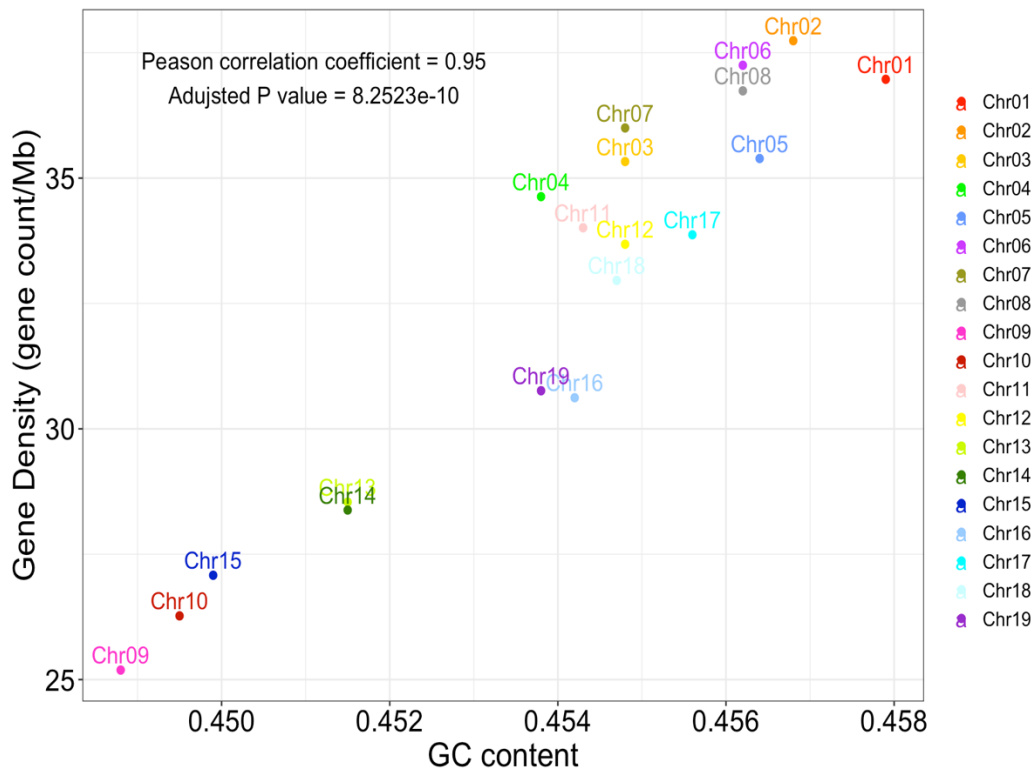

**Supplementary Fig. 13. Correlation analysis of GC content and gene density.** Pearson's rho rank correlation coefficient was computed using the R function `rcorr` within Hmisc package.

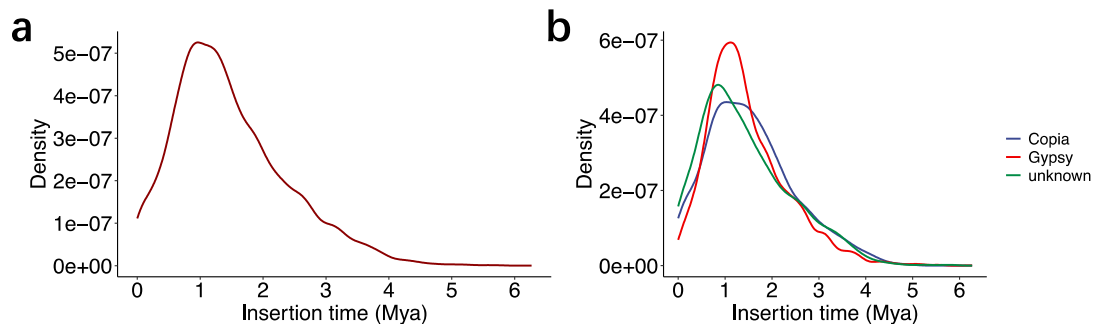

**Supplementary Fig. 14. The frequency distribution of intact LTR-RTs insertion time.** **a** The frequency distribution of insertion time of intact LTR-RTs in *M. lutarioriparius* genome. **b** The detailed frequency distribution of insertion time of intact *Copia*, *Gypsy* and other unclassified LTR-RTs in *M. lutarioriparius* genome.

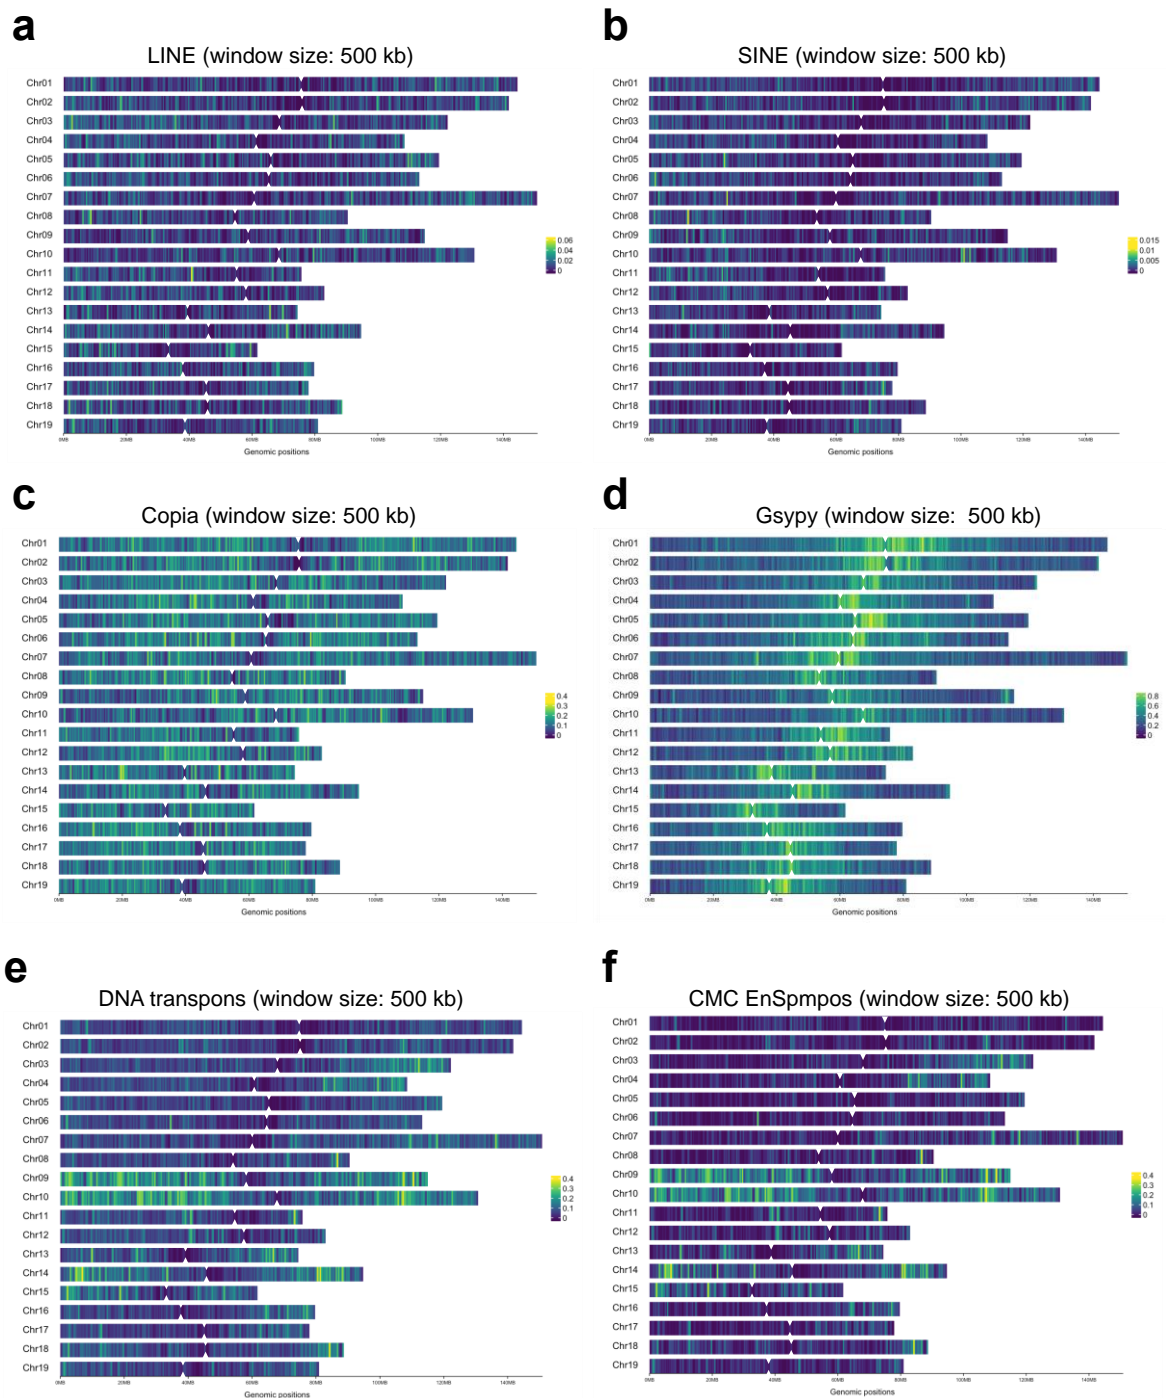

**Supplementary Fig. 15. The density distribution of repeat elements across 19 chromosomes.** The density for each type repeat elements is plotted using a non-overlap sliding window approach. The window size used for all repeat elements above is 500 kb. The chromosomal incisions indicate the location of centromeres. **a** LINE (Long Interspersed Nuclear Element). **b** SINE (Short Interspersed Nuclear Element). **c** *Copia*. **d** *Gypsy*. **e** DNA transposons. **f** CMC EnSpmpos.

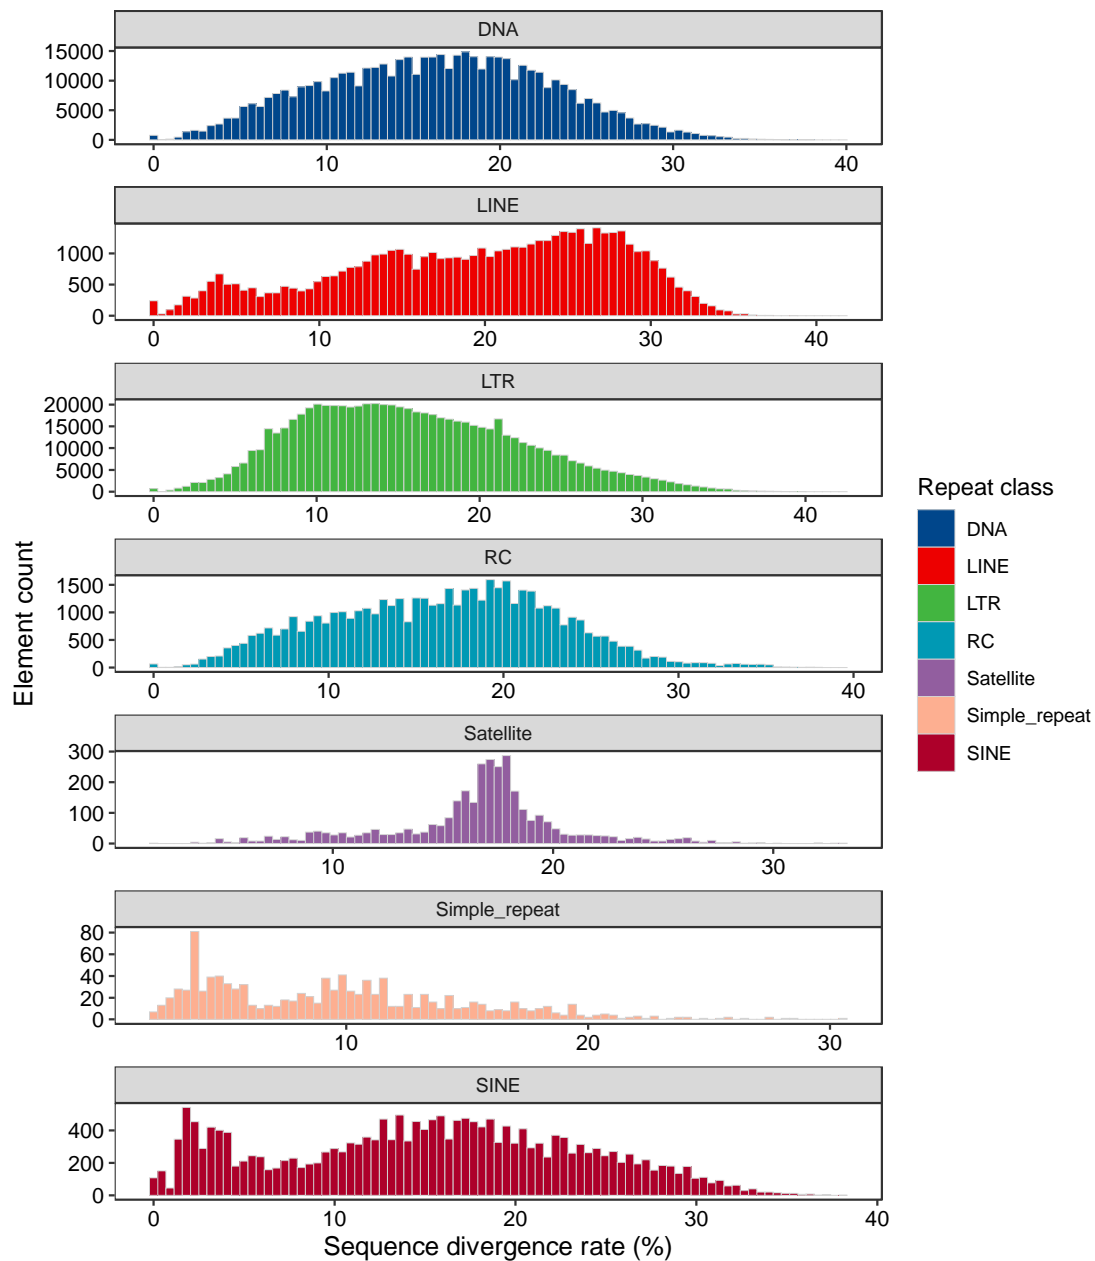

**Supplementary Fig. 16. Distribution of divergence rates of different transposable element (TE) types in *M. lutarioriparius* genome.** Definitions of the abbreviations follow: DNA, DNA transposon; LINE, Long Interspersed Nuclear Element; LTR, Long Terminal Repeat retroelement; RC, RC/Helitron; SINE, Short Interspersed Nuclear Element.

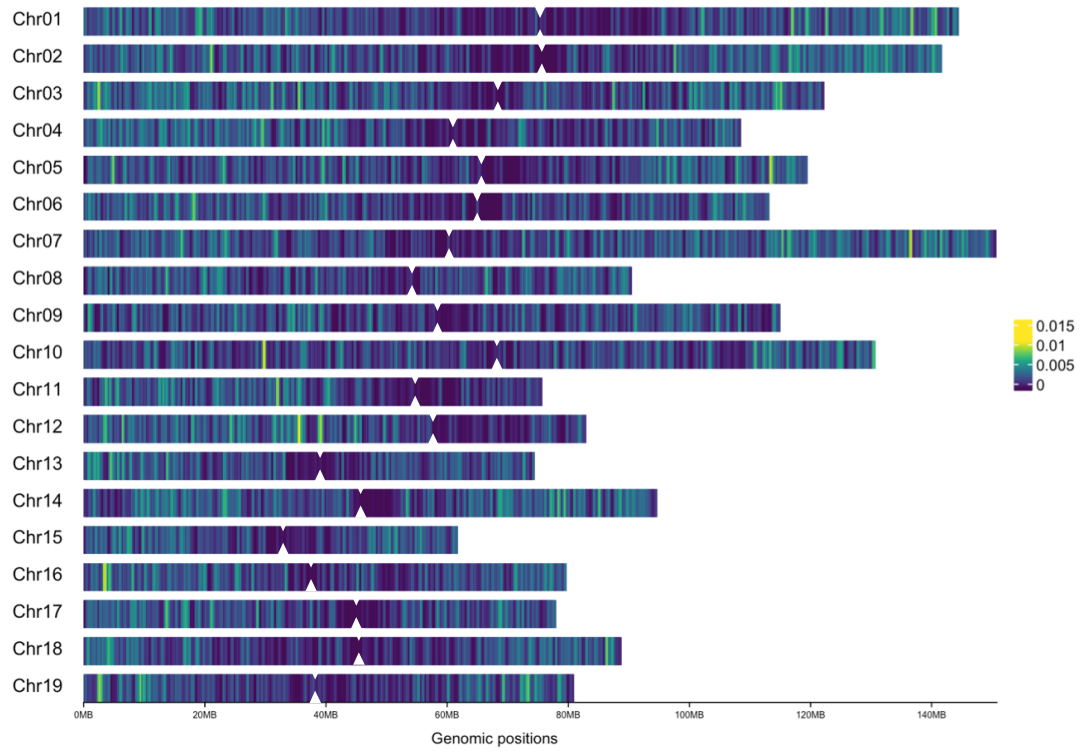

**Supplementary Fig. 17. The density distribution of MITEs.**



**a**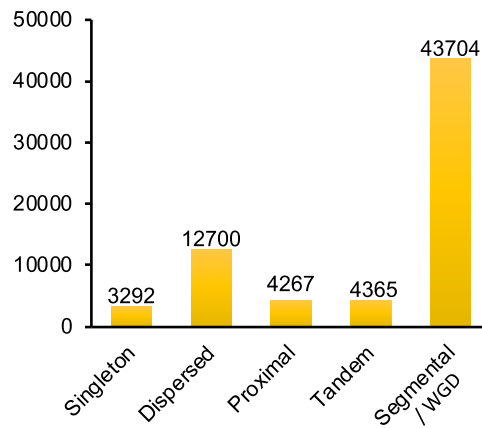**b**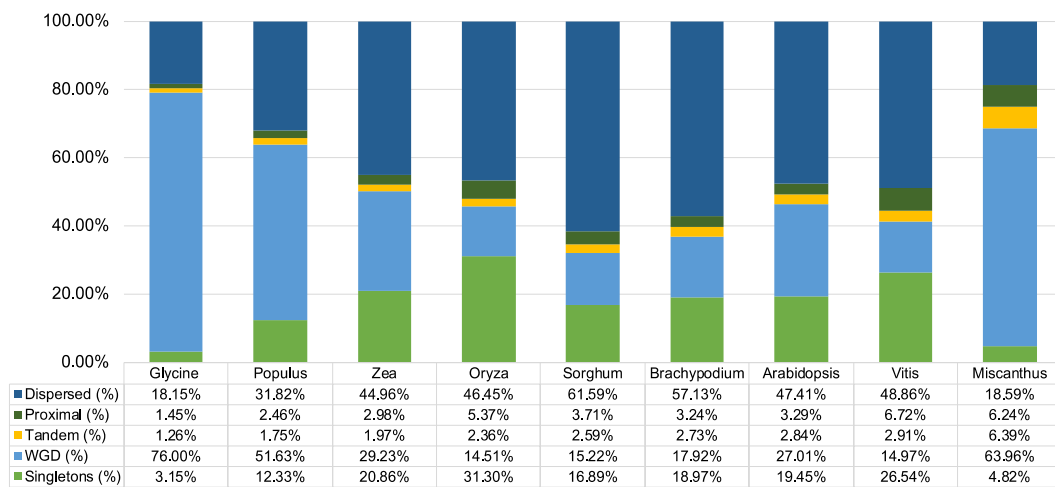

**Supplementary Fig. 18. Different origins of genes in *M. lutarioriparius* genome.** **a** The number of genes for each duplication mode. The origin of genes in *M. lutarioriparius* were classified into singleton (no duplication), dispersed (duplication type other than WGD/segmental, tandem and proximal), proximal (two duplicated genes are distributed adjacent to each other on chromosomes, with no more than 10 genes spaced but not adjacent), tandem (consecutive repeat) and segmental/whole genome duplications (collinear genes in collinear blocks) using MCScanX<sup>1</sup>. **b** The numbers of genes from different origins in nine angiosperm genomes. Except *Miscanthus*, the statistics of gene origins of other eight angiosperms come from the MCScanX software paper<sup>1</sup>.

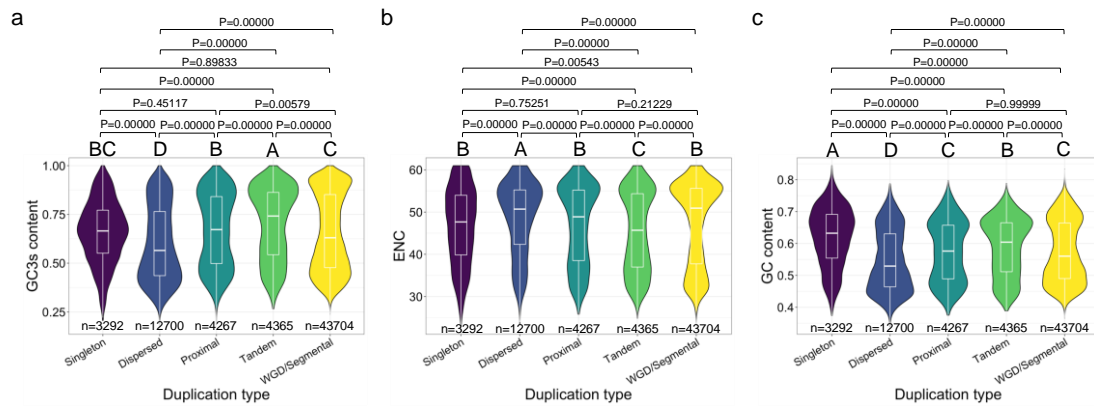

**Supplementary Fig. 19. The distribution of GC3s, effective number of codons (ENC/Nc) and GC content for genes resulted from different duplication mode. a** GC3s content. **b** Effective number of codons (ENC/Nc). **c** GC content. The different duplication type (Singleton, Dispersed, Proximal, Tandem and WGD/Segmental) labeled with different capital letters differ significantly in GC3s, effective number of codons and GC content (Statistical comparison was carried out using ANVOA followed by Tukey Honest Significant Differences analysis,  $P < 0.01$ ). In each boxplot, the center line indicates the median, the lower and upper hinges represent the first and third quartiles, the upper whisker extends to the largest value less than  $1.5 \times$  the interquartile range (IQR), the lower whisker extends to the smallest value at most  $1.5 \times$  the IQR, the black point represent outlier. The number of data points used for plotting is shown at the bottom.

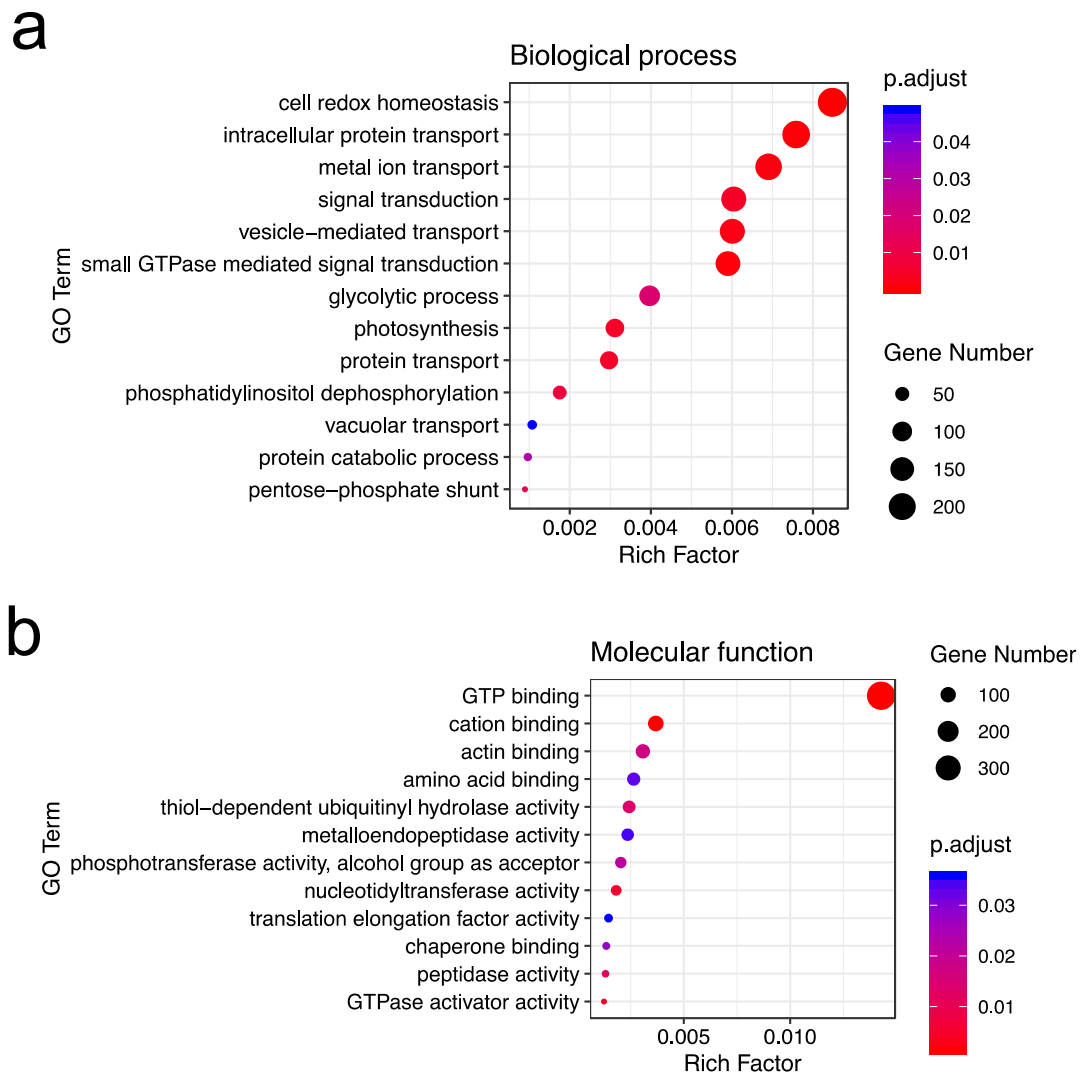

**Supplementary Fig. 20. Gene Ontology (GO) enrichment analysis of *M. lutarioriparius* WGD/segmental duplication.** **a** GO enrichment results of biological process category. The color of circle represents the FDR (false discovery rate) in the hypergeometric test corrected using BH method<sup>2</sup>. The size of circle represents the gene count of the GO terms. The rich factor is defined as gene count / total query gene count. **b** GO enrichment results of molecular function category. The color of circle represents the FDR (false discovery rate) in the hypergeometric test corrected using BH method<sup>2</sup>. The size of circle represents the gene count of the GO terms. The rich factor is defined as gene count / total query gene count.

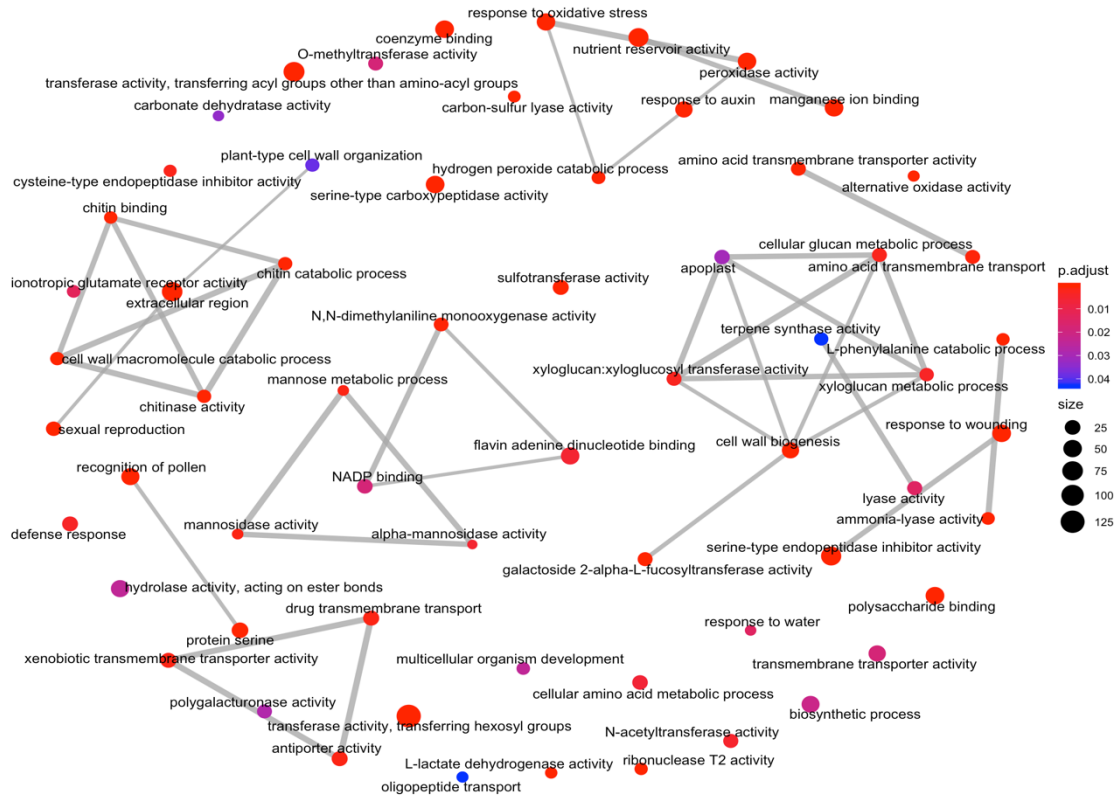

**Supplementary Fig. 21. Enrichment Map for enrichment result of over-representation test for gene duplicates from tandem duplication.** Mutually overlapping gene sets tend to cluster together, making it easier for interpretation.

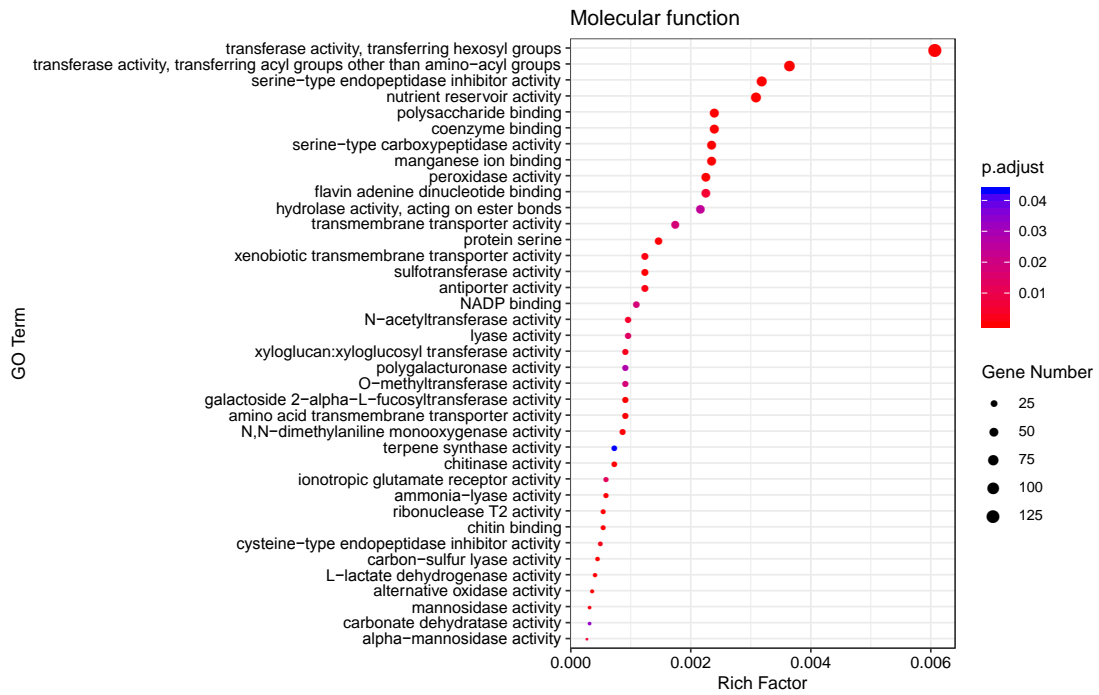

**Supplementary Fig. 22. Gene Ontology (GO) enrichment analysis of *M. lutarioriparius* genes resulted from tandem duplication (molecular function category).** The color of circle represents the FDR (false discovery rate) in the hypergeometric test corrected using BH method<sup>2</sup>. The size of circle represents the gene count of the GO terms. The rich factor is defined as gene count / total query gene count.

a

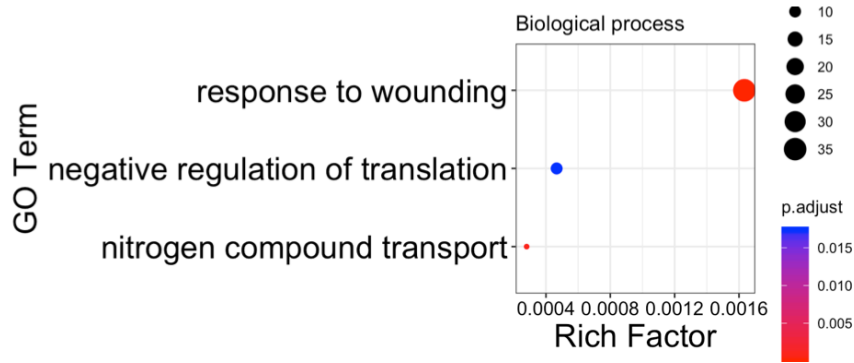

b

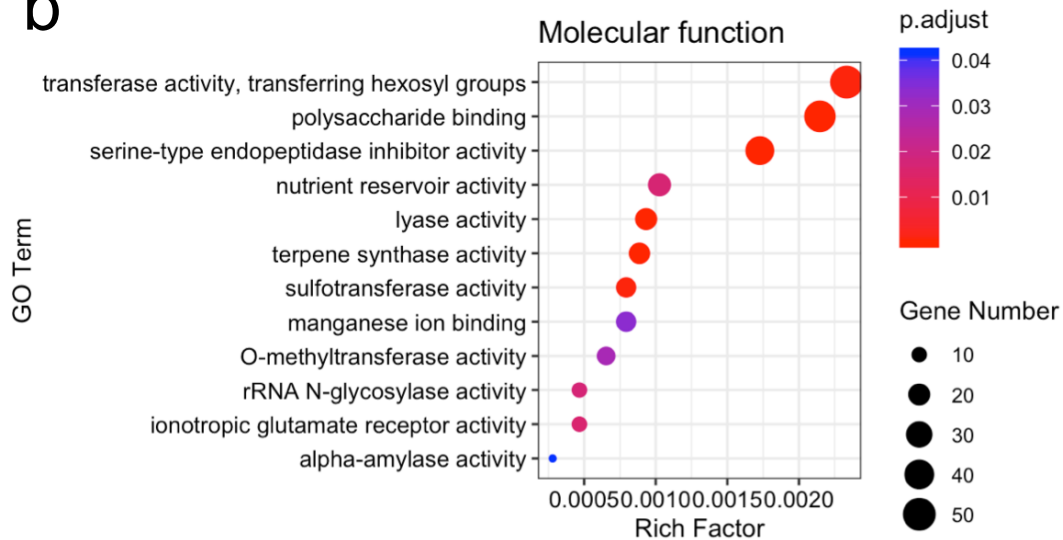

**Supplementary Fig. 23. Gene Ontology (GO) enrichment analysis of *M. lutarioriparius* gene duplicates from proximal duplication.** **a** Biological process category. The color of circle represents the FDR (false discovery rate) in the hypergeometric test corrected using BH method<sup>2</sup>. The size of circle represents the gene count of the GO terms. The rich factor is defined as gene count / total query gene count. **b** Molecular function category. The color of circle represents the FDR (false discovery rate) in the hypergeometric test corrected using BH method<sup>2</sup>. The size of circle represents the gene count of the GO terms. The rich factor is defined as gene count / total query gene count.

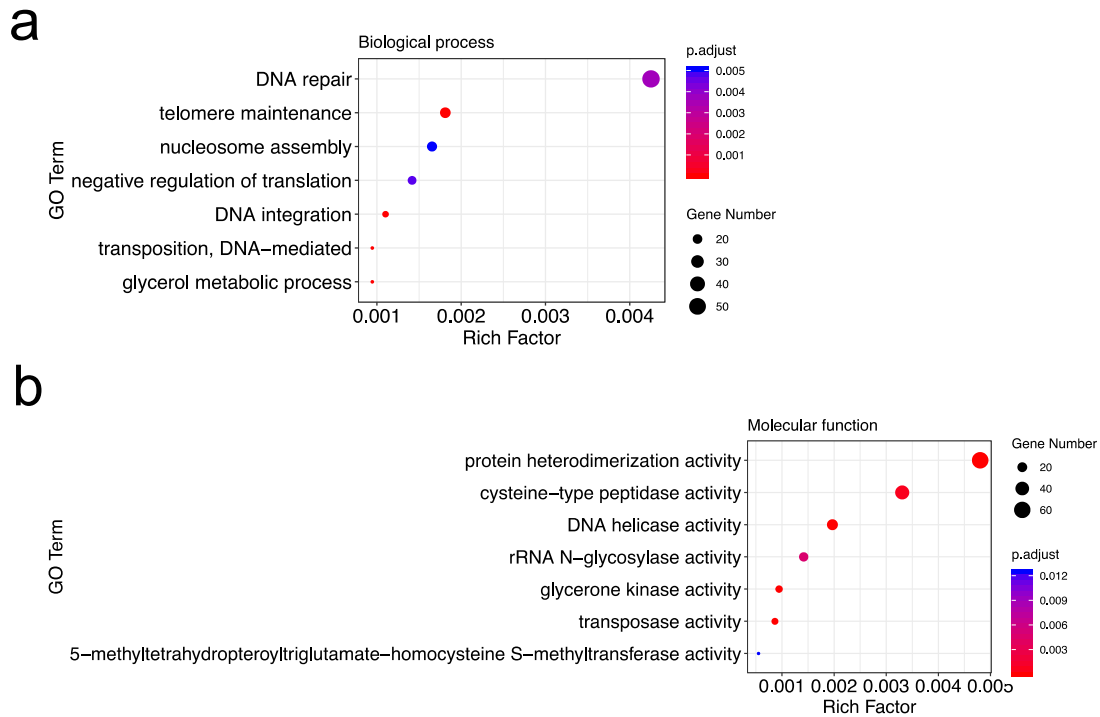

**Supplementary Fig. 24. Gene Ontology (GO) enrichment analysis of *M. lutarioriparius* gene duplicates of dispersed duplication origin.** **a** GO enrichment results of biological process category. The color of circle represents the FDR (false discovery rate) in the hypergeometric test corrected using BH method<sup>2</sup>. The size of circle represents the gene count of the GO terms. The rich factor is defined as gene count / total query gene count. **b** GO enrichment results of molecular function category. The color of circle represents the FDR (false discovery rate) in the hypergeometric test corrected using BH method<sup>2</sup>. The size of circle represents the gene count of the GO terms. The rich factor is defined as gene count / total query gene count.

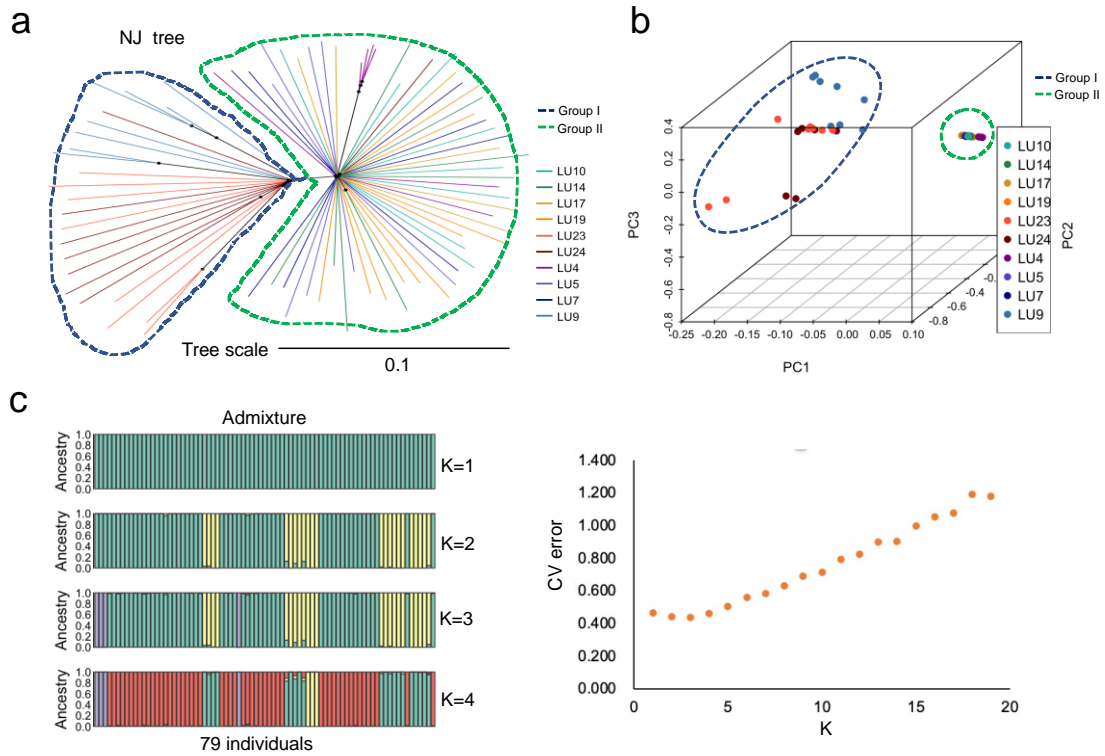

**Supplementary Fig. 25. Genetic diversity analysis of *Miscanthus lutarioriparius* populations based on transcriptome data.** **a** Neighbor-joining tree reconstructed using the SNPs identified by transcriptome data. Lines of different colors indicate different populations of *Miscanthus lutarioriparius*. The dotted lines in green and blue represent Group I and Group II, respectively. **b** Principal component analysis based on the SNPs identified by transcriptome data. Points of different colors indicate different populations of *Miscanthus lutarioriparius*. Two circles indicate Group I and II of *Miscanthus lutarioriparius*. Our sequenced *M. lutarioriparius* is belong to Group II (not show in this plot). **c** Admixture analysis based on the SNPs identified by transcriptome data.



**a**

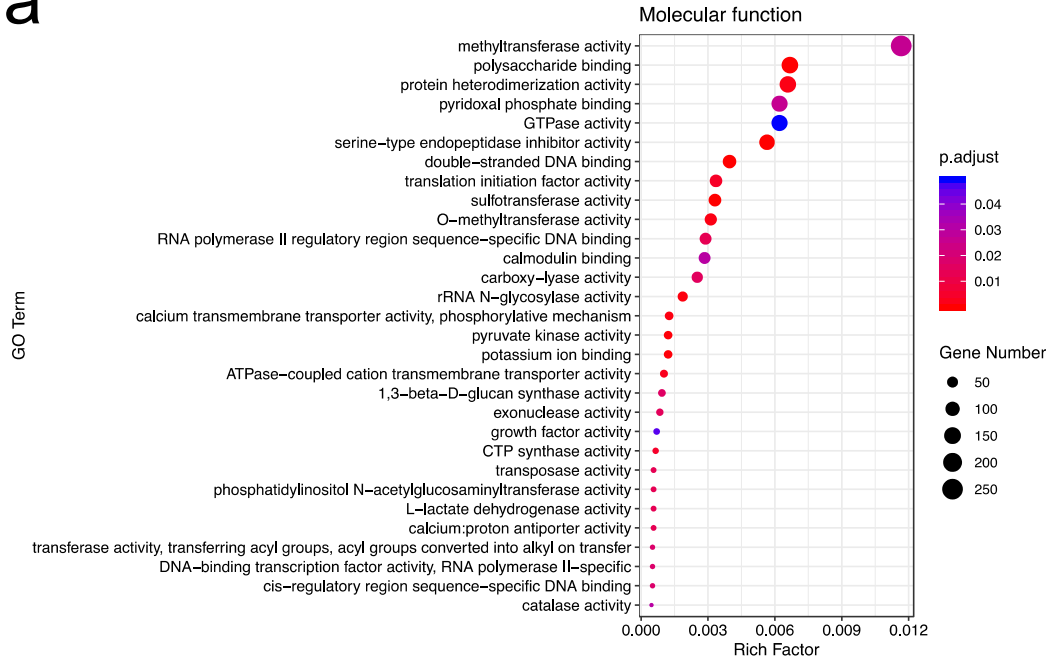

**b**

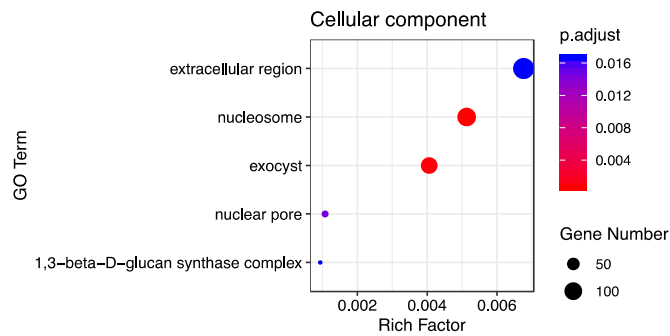

**Supplementary Fig. 26. Dot-plot of GO enrichment for 9,509 expanded gene families of *M. lutarioriparius*.** **a** GO enrichment results of biological process category. The color of circle represents the FDR (false discovery rate) in the hypergeometric test corrected using BH method<sup>2</sup>. The size of circle represents the gene count of the GO terms. The rich factor is defined as gene count/total query gene count. **b** GO enrichment results of cellular component category. The color of circle represents the FDR (false discovery rate) in the hypergeometric test corrected using BH method<sup>2</sup>. The size of circle represents the gene count of the GO terms. The rich factor is defined as gene count/total query gene count.

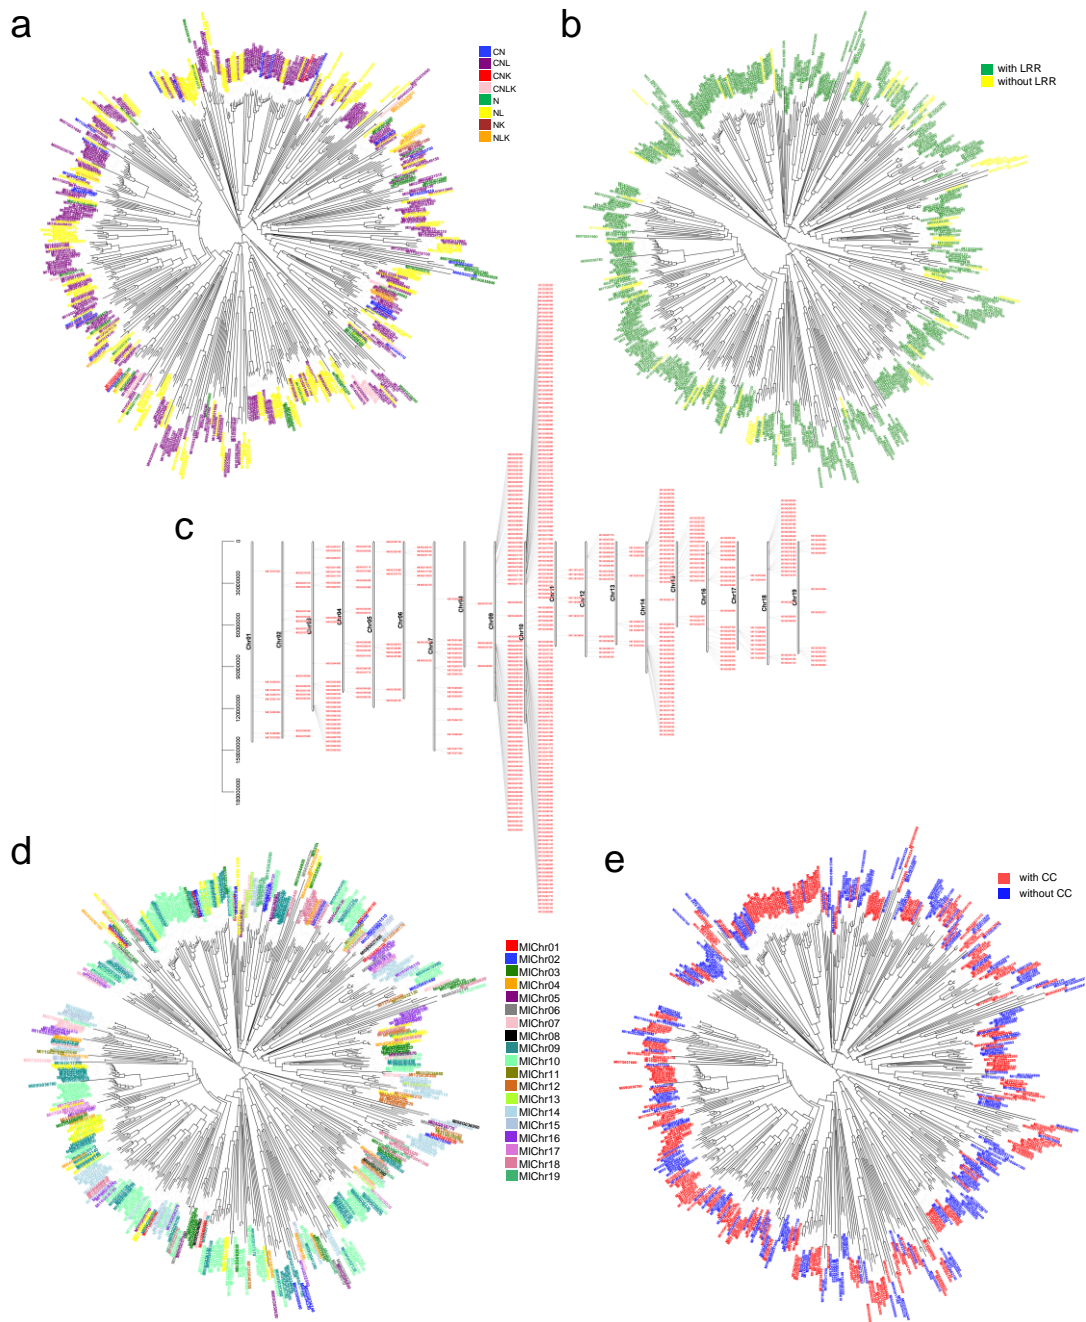

**Supplementary Fig. 27. Phylogenetic tree reconstructed based on the amino acid sequences in the NBS domain of NBS-encoding genes from *M. lotarioriparius*. a** Color-coded by classification of NBS-encoding genes. **b** Color-coded by presence or absence of LRR domain. **c** Genomic distribution of NBS-encoding genes. **d** Color-coded by presence or absence of CC domain. **e** Color-coded by chromosome as indicated.

a

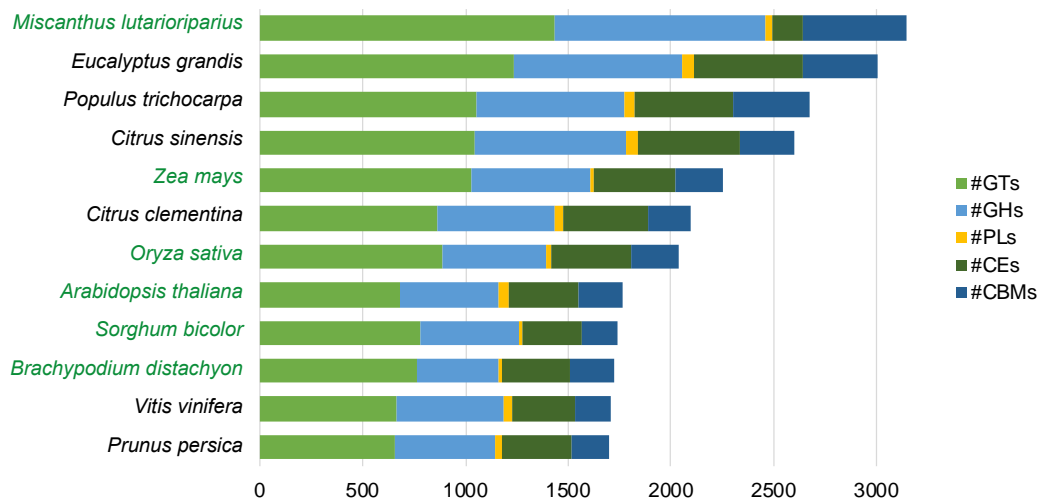

b

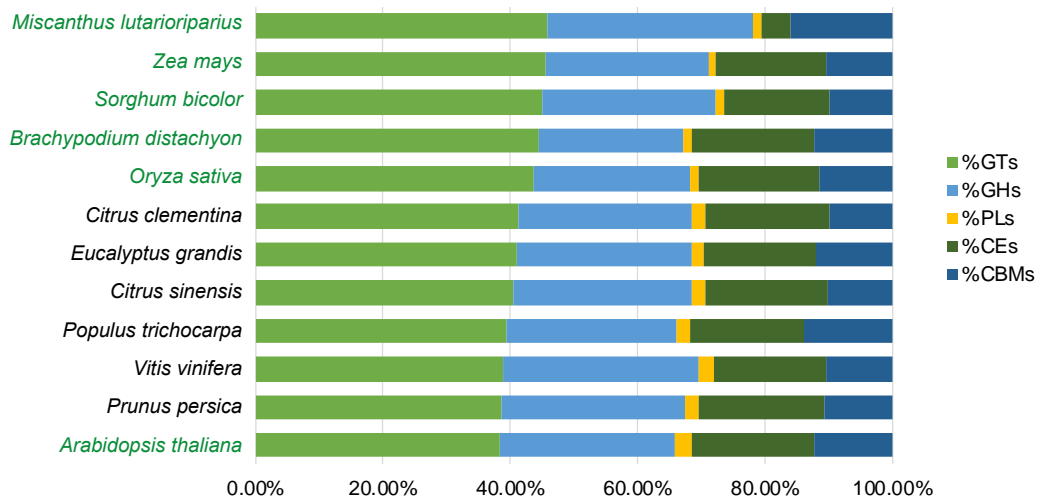

**Supplementary Fig. 28. CAZyme domain classes frequency distribution in twelve plant species.** **a** Absolute frequency of CAZyme domain classes in twelve plant species. Plant species are on the y-axis, and the frequency of CAZyme domains within all CAZyme genes is shown on the x-axis. The green color of plant species is used to indicate the herbaceous species, while the black is used to indicate the woody species. The glycosyl transferase (GT) domain class is indicated using green, glycosyl hydrolase (GH) domain class using blue, polysaccharide lyase (PL) domain class using yellow, carbohydrate esterase (CE) domain class using dark green and carbohydrate binding module (CBM) domain class using dark blue. Except *Miscanthus lutarioriparius*, the other data came from Pinard et al.<sup>3</sup>. **b** Relative frequency of CAZyme domain classes in twelve plant species. The relative frequency of carbohydrate active enzyme (CAZyme) domain classes, as a percentage, is shown on the x-axis. The species of plant is shown on the y-axis.

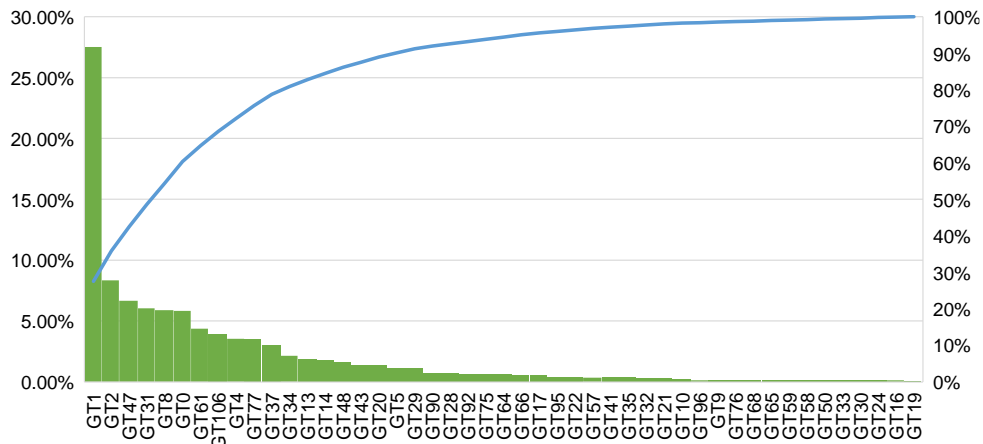

**Supplementary Fig. 29. Frequency distribution of gene members of GT family.**

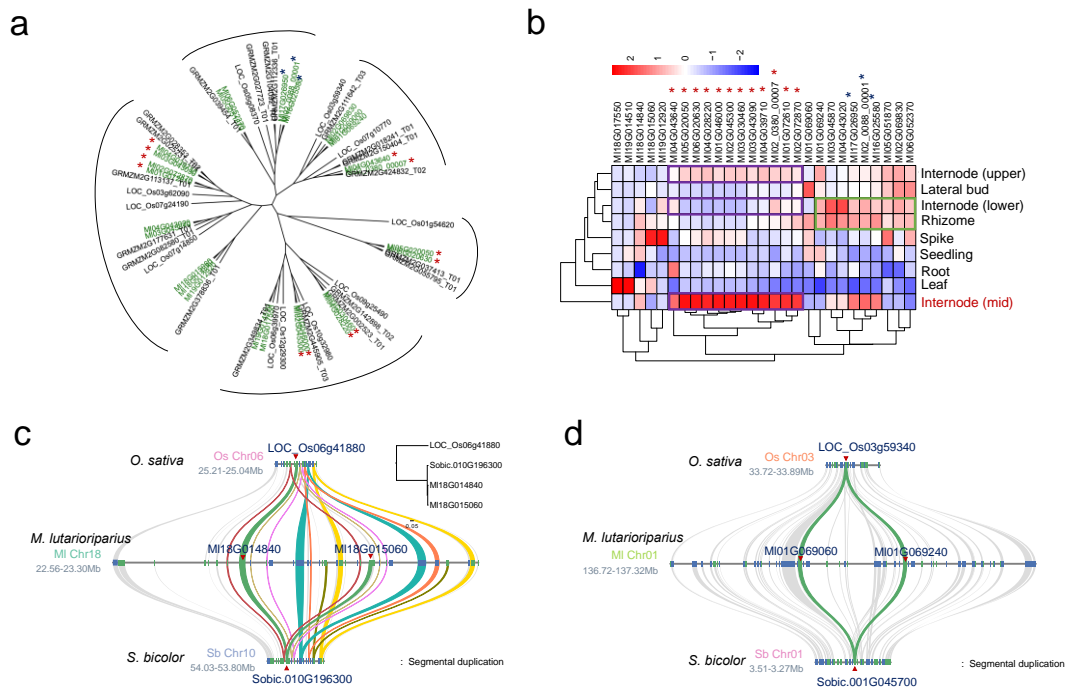

**Supplementary Fig. 30. *Cesa* genes of *M. lutarioriparius*.** **a** Phylogeny tree of *Cesa* genes reconstructed using maximum likelihood approach by running IQtree software using protein sequences of *M. lutarioriparius*, rice and maize. Green color is used to indicate the genes of *M. lutarioriparius*. **b** Expression pattern of *Cesa* genes in 9 transcriptome samples. Red and blue stars were used to indicate the *Cesa* genes that have specifically high expression in the mid of internode. **c** Segmental duplication leads to the expansion of *M. lutarioriparius* *Cesa* genes (M18G014840 and M18G015060). **d** Segmental duplication leads to the expansion of *M. lutarioriparius* *Cesa* genes (M01G069060 and M01G069240).

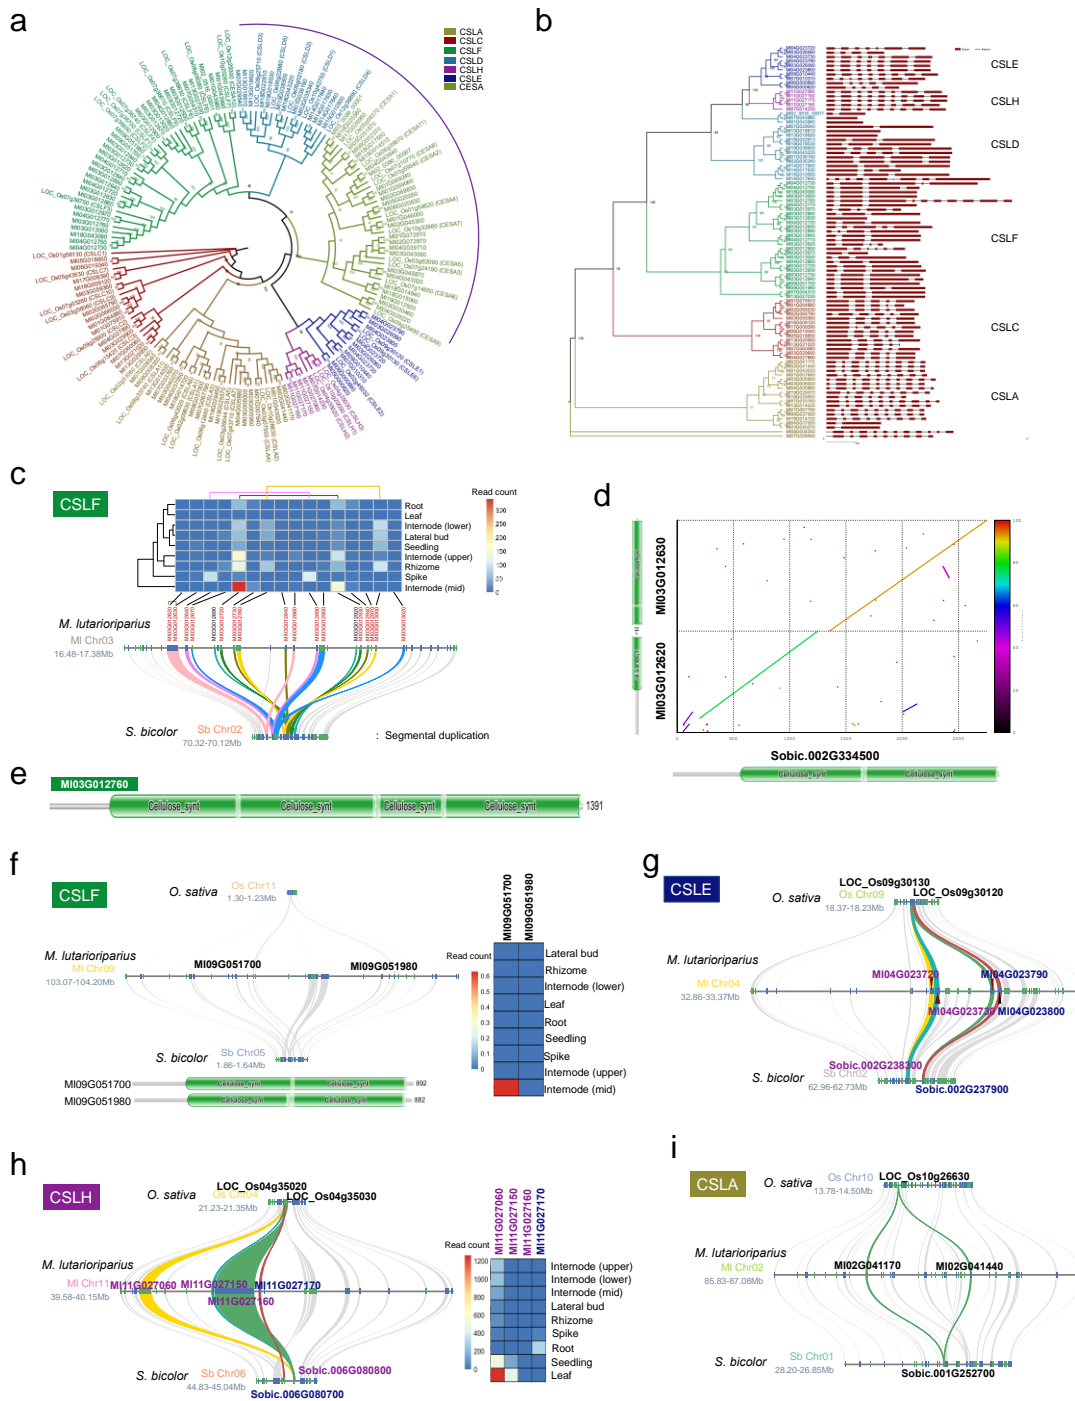

**Supplementary Fig. 31. Csl gene family of *M. lutarioriparius*.** **a** Phylogeny tree of Csl and CesA of *M. lutarioriparius* was reconstructed using maximum likelihood approach. Different colors were used to indicate the groups. Bootstrap values (integer) are indicated at the nodes. **b** Gene structure diagram of Csl gene family of *M. lutarioriparius*. Red rectangles and black lines were used to indicate the exons and introns, respectively. **c** The segmental duplication of CsIF genes was occurred in *M. lutarioriparius* after it's split with sorghum. And expression heatmap of CsIF gene family in 9 transcriptome samples. Links with same color is used to indicate the syntenic gene pairs that share common sorghum genes. The red gene symbols of *M. lutarioriparius* are Csl genes. The expression pattern of CsIF genes in 9 transcriptome samples are shown using heatmap. **d** Comparison of sequence similarity between MI03G012620 and MI03G012630. **e** Gene fusion occurred in MI03G012760. Pfam domain of Cellulose\_synt (PF03552) is indicated by green rectangle.

**f** *M. lutarioriparius* specific duplication of CslF genes, which have no homolog in the expected collinear regions in both sorghum and rice genomes. These two Csl genes were confirmed by Pfam annotation. Heatmap is used to show the library-size normalized read count of MI09G05170 and MI09G051980, showing very low expression for both genes in 9 transcriptome samples. **g** Tandem duplication of CslE genes occurred in *M. lutarioriparius* after its split with sorghum. **h** Tandem and proximal duplication of CslH genes occurred in *M. lutarioriparius* after its split with sorghum. **i** Proximal duplication of CslA genes in *M. lutarioriparius* after its split with sorghum. The green lines were used to indicate the CslA genes collinearity between *M. lutarioriparius* and sorghum.

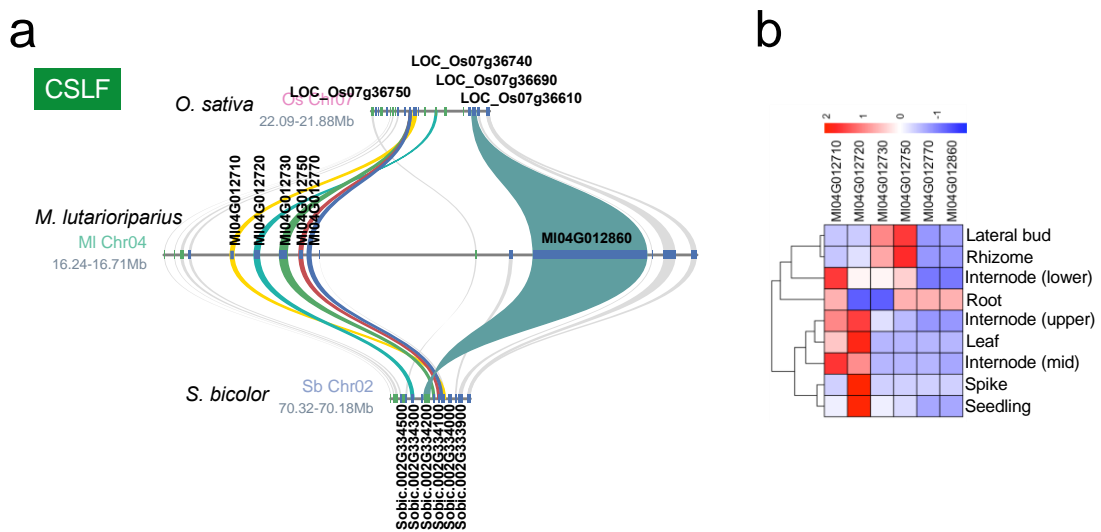

**Supplementary Fig. 32. The marscosynteny of CslF family among *M. lutarioriparius*, rice and sorghum. a** The syntenic gene pairs between *M. lutarioriparius*, rice and sorghum. **b** The expression pattern of gene members in CslF family of *M. lutarioriparius*.

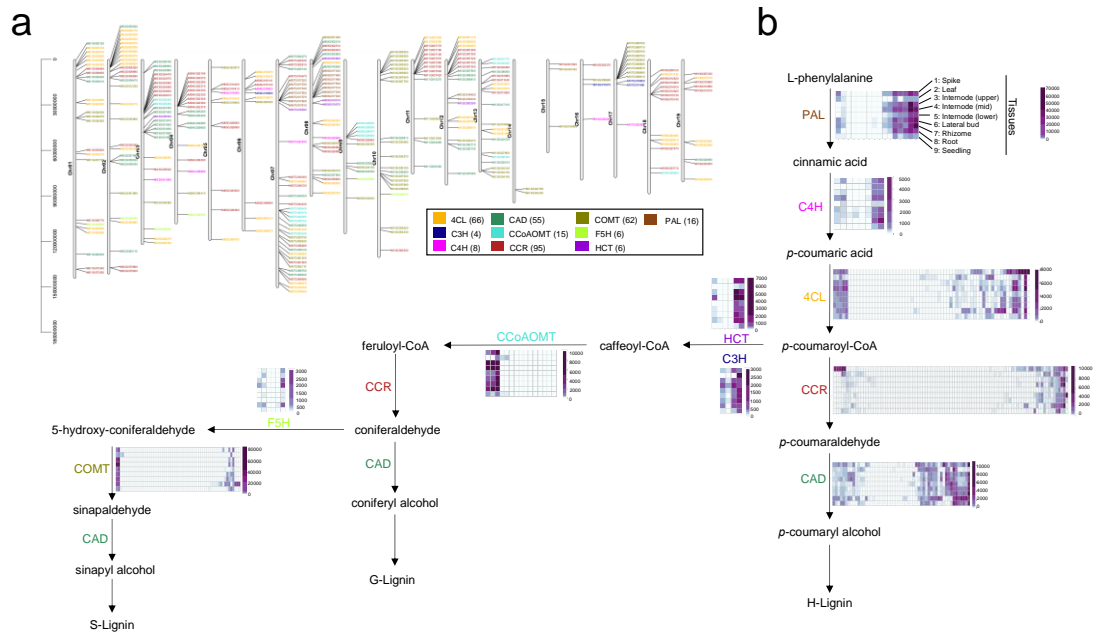

**Supplementary Fig. 33. Genes involved in lignin biosynthesis in *M. lutarioriparius*.** **a** Gene position on chromosomes. Legend: the numbers in parentheses indicate gene counts. **b** Gene expression heatmap (normalized read count) and lignin biosynthesis pathway. 4CL: 4-coumarate: CoA ligase; C3H: p-coumarate-3-hydroxylase; C4H: Trans-cinnamate 4-hydroxylase; CAD: cinnamyl alcohol dehydrogenase; CCoAOMT: Caffeoyl coenzyme A-3-O-methyltransferase; CCR: cinnamoyl CoA reductase; COMT: caffeic acid O-methyltransferase; F5H: ferulate-5-hydroxylase; HCT: hydroxycinnamoyl-CoA shikimate/quinic acid hydroxycinnamoyl transferase; PAL: phenylalanine ammonia-lyase.

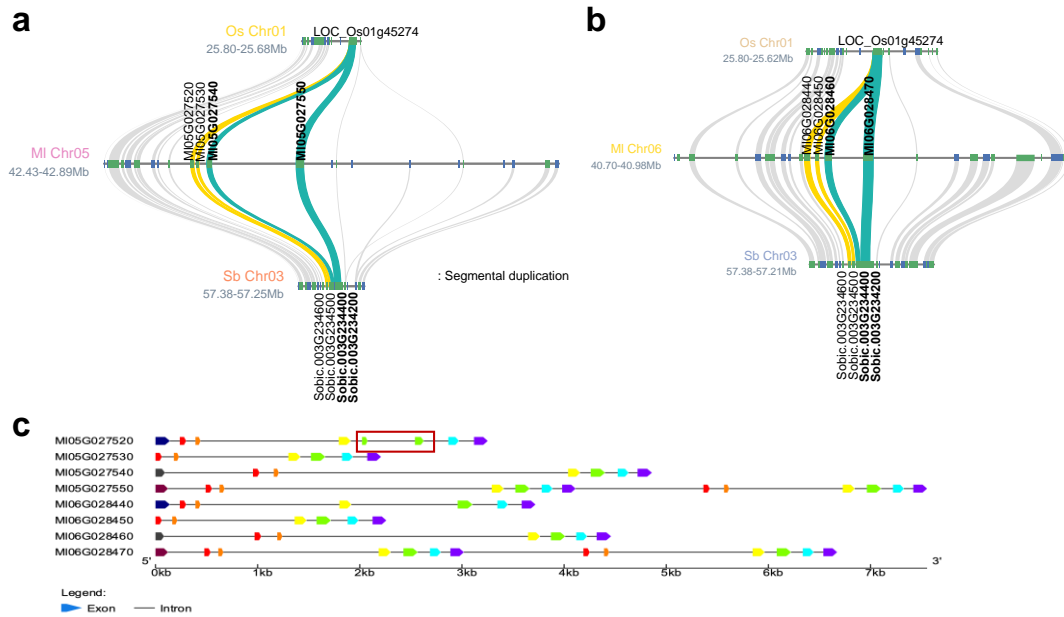

**Supplementary Fig. 34. CA enzyme genes of *M. lutarioriparius* were located in two tandem duplication blocks.** **a** Gene synteny of CA enzyme genes among *M. lutarioriparius* (chromosome 5), sorghum and rice. **b** Gene synteny of CA enzyme genes among *M. lutarioriparius* (chromosome 6), sorghum and rice. **c**, Gene structure diagram of *M. lutarioriparius* CA enzyme genes located in chromosome 5 and 6. Colored squares and black lines were used to indicate the exons and introns, respectively. Same color indicates the sequence with high similarity. Based on gene structure and sequence identity, MI05G027550 is likely to be derived from the fusion of two neighboring genes.

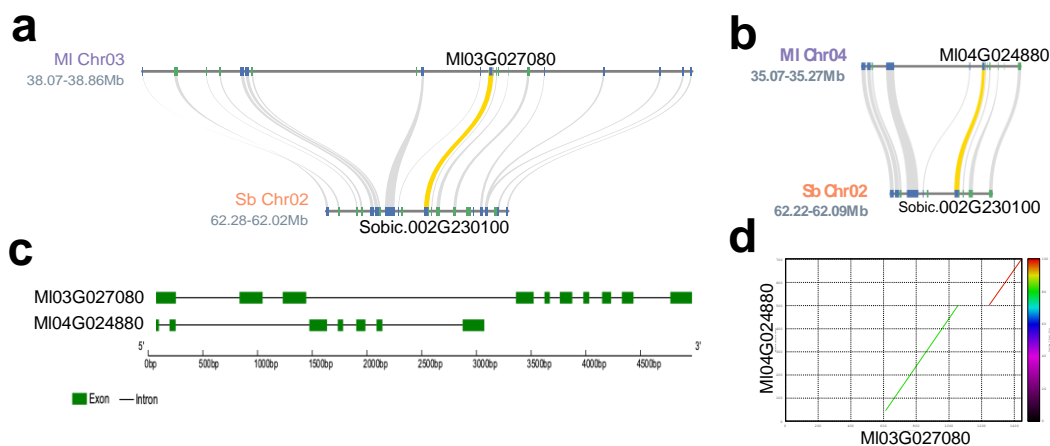

**Supplementary Fig. 35. Identification of *M. lutarioriparius* CA enzyme genes MI03G027080 and MI04G024880.** **a** *M. lutarioriparius* CA enzyme gene MI03G027080 is syntenic with sorghum Sobic.002G230100. **b** *M. lutarioriparius* CA enzyme gene MI04G024880 is syntenic with sorghum Sobic.002G230100. **c** Gene structure of CA enzyme genes MI03G027080 and MI04G024880. The green rectangles and black lines represent exons and introns, respectively. **d** Comparison of coding sequence between MI03G027080 and MI04G024880.



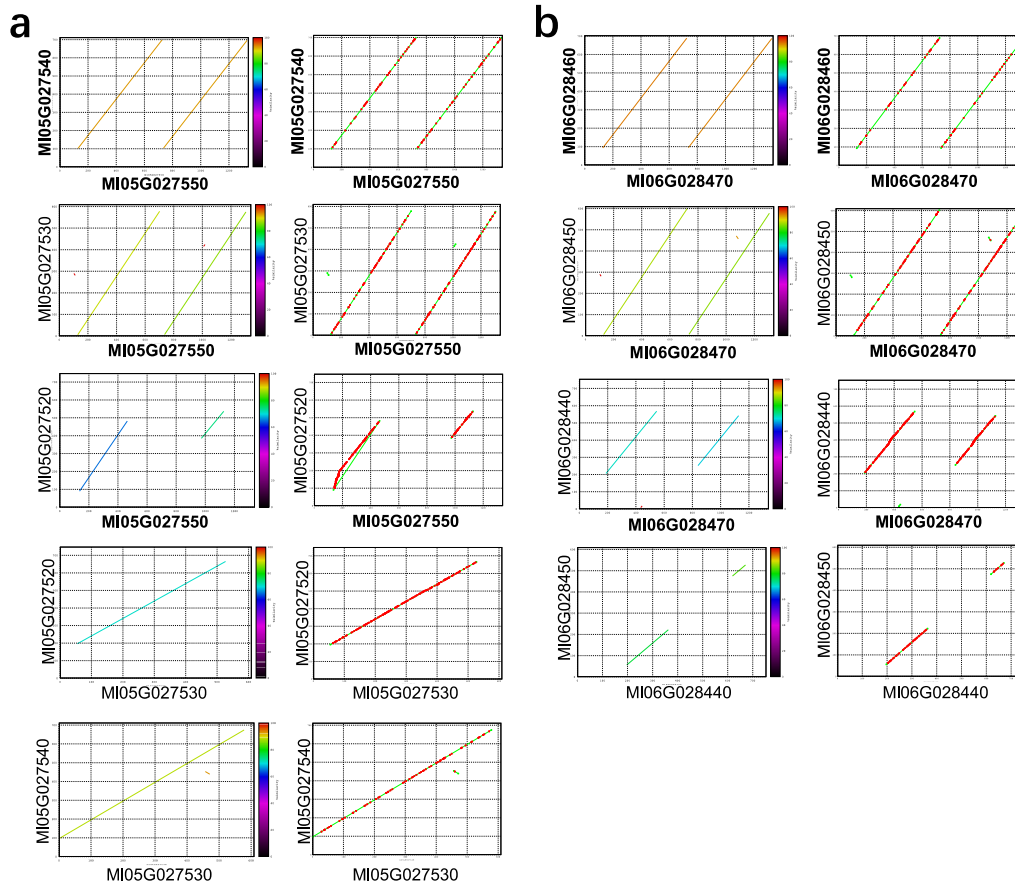

**Supplementary Fig. 36. Dot-plots of *M. lutarioriparius* CA enzyme genes (CDS).** **a** Dot-plots of *M. lutarioriparius* CA enzyme genes that located in chromosome 5, the left panel displays the overall sequence similarity between two comparing sequences, the right panel shows the SNPs with red dot between two sequences. Bold characters represent putative C<sub>4</sub> genes. **b** Dot-plots of *M. lutarioriparius* CA enzyme genes that located in chromosome 6.

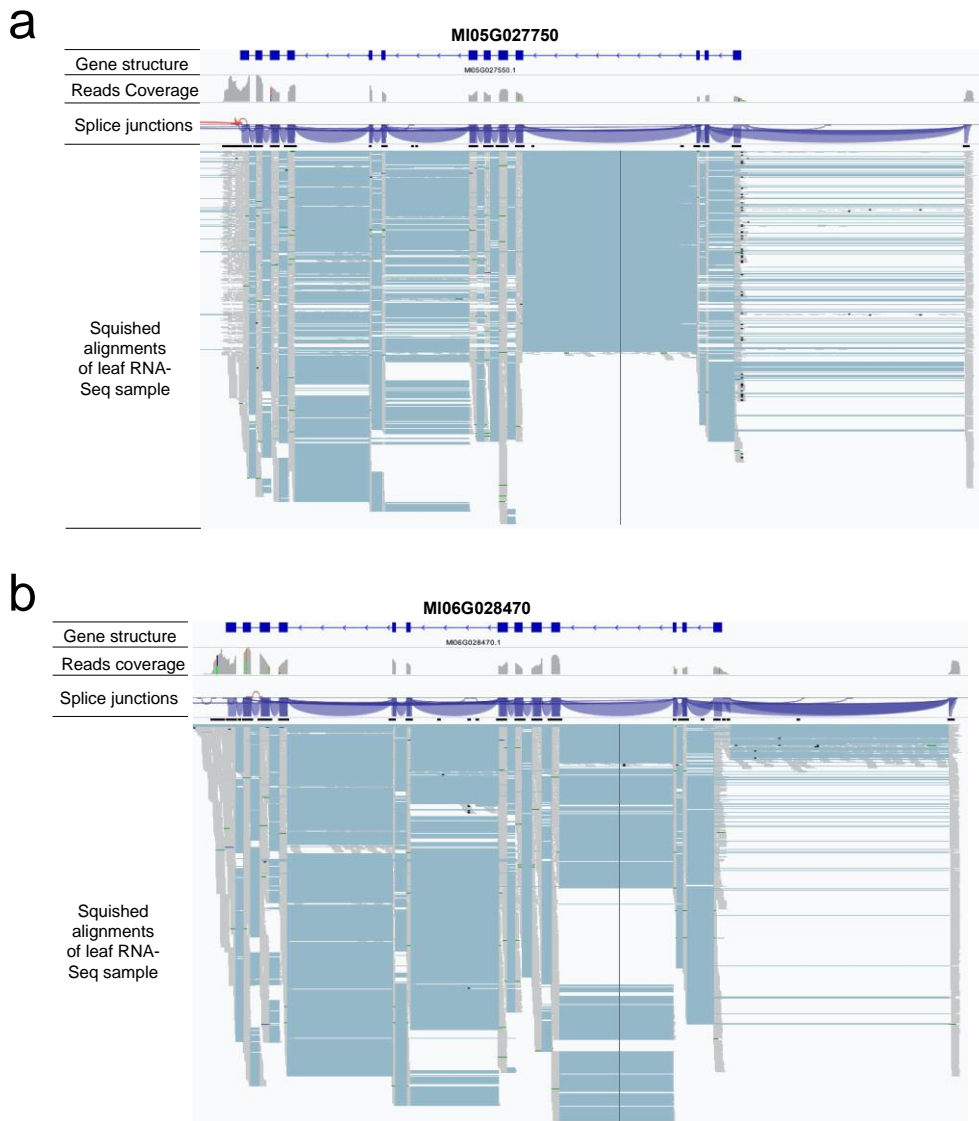

**Supplementary Fig. 37. The visualization of RNA-Seq reads alignment to two CA genes (MI05G027750 and MI06G028470).** **a** The RNA-Seq reads alignment of leaf sample on MI05G027750. The first track showed the gene structure diagram. Blue-colored rectangles and lines were used to represent exons and introns, respectively. The second track showed the leaf RNA-Seq reads coverage on gene MI05G027750. The third track showed the splice-junctions of leaf RNA-Seq reads that mapped to gene MI05G027750. The fourth track showed the squished alignments of leaf RNA-Seq reads on gene MI05G027750. The grey lines were used to indicate the RNA-Seq short reads and the light blue lines represented the splice-junctions of RNA-Seq short reads. **b** The RNA-Seq reads alignment of leaf sample on MI06G028470.

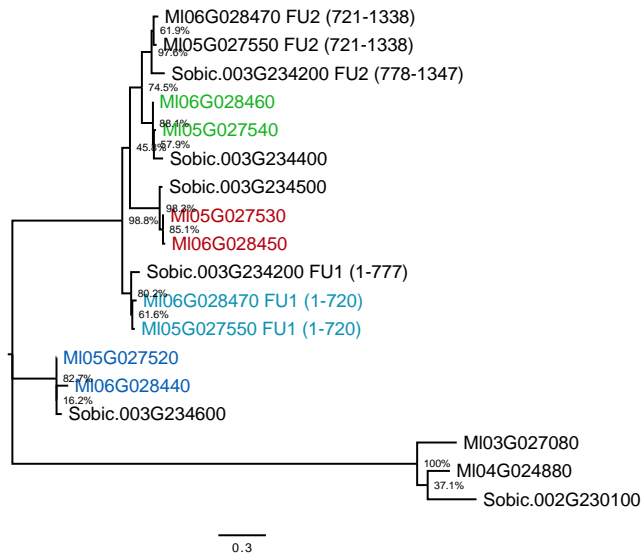

**Supplementary Fig. 38. Neighbor-joining tree of *M. lutarioriparius* CA enzyme genes (CDS) and sorghum CA enzyme genes (CDS) reconstructed using MEGA X software with 1,000 replicates of bootstrap test. Numbers at nodes indicate the percentage bootstrap scores from 1,000 replicates.**

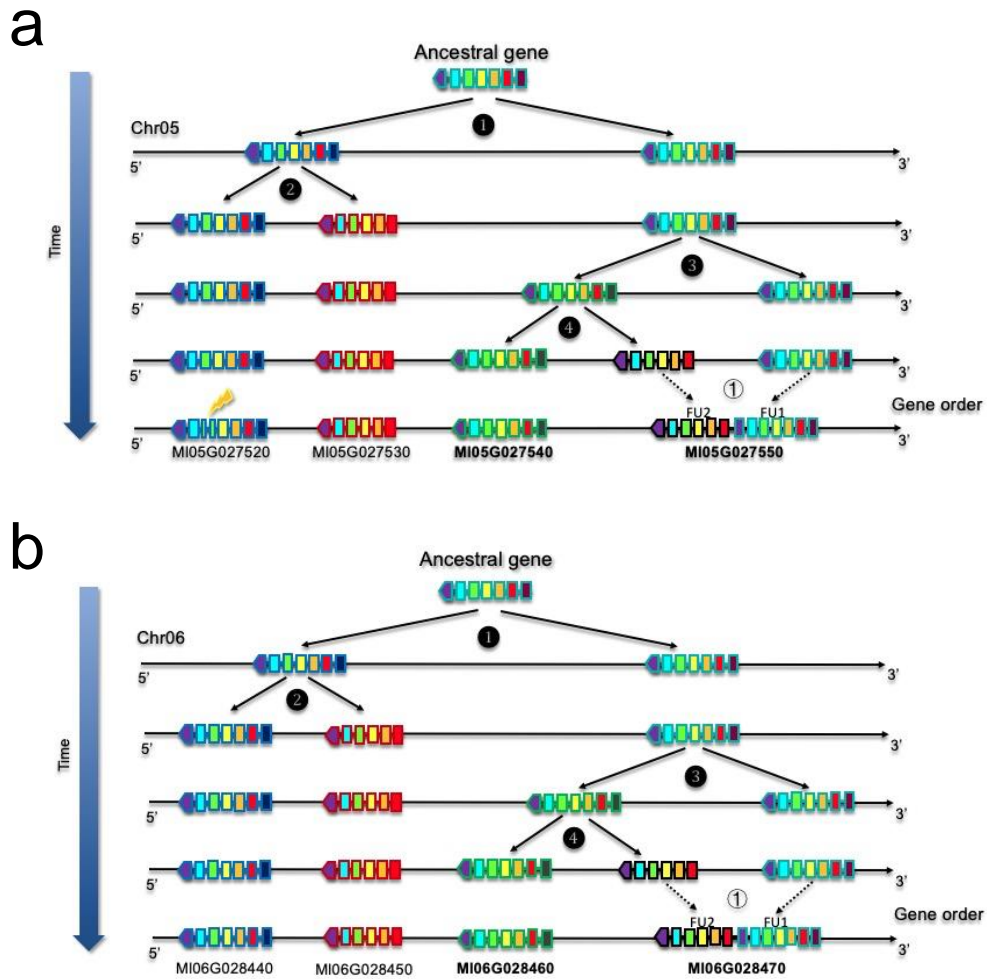

**Supplementary Fig. 39. Inferred duplication evolutionary model of CA enzyme genes.** The CA enzyme genes in *M. lutarioriparius* underwent four-time gene duplication and one gene fusion event. Four-time gene duplication events of CA enzyme genes were indicated using the number in black circles. The gene fusion event was indicated using the number in the white circle. The colored blocks were used to represent the exons of CA enzyme genes. Same color indicates high sequence similarity. Exon segmentation of MI05G027520 gene was indicated using a lightning symbol. Bold characters represent putative C<sub>4</sub> genes.

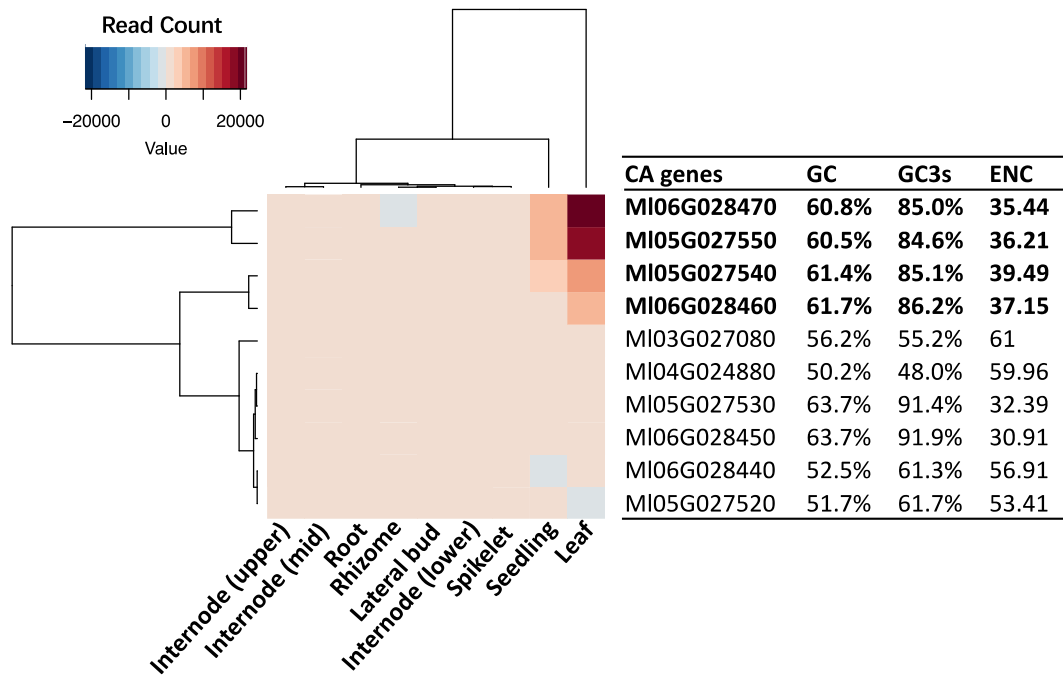

**Supplementary Fig. 40. Expression profile of *M. lutarioriparius* CA enzyme gene among different tissue samples and GC, GC3s and ENC of *M. lutarioriparius* CA enzyme genes.** Different color gradients represent the library-normalized read count of each CA enzyme genes; GC3s: GC of silent 3rd codon position; ENC: The effective number of codons. Bold characters represent putative C<sub>4</sub> genes.

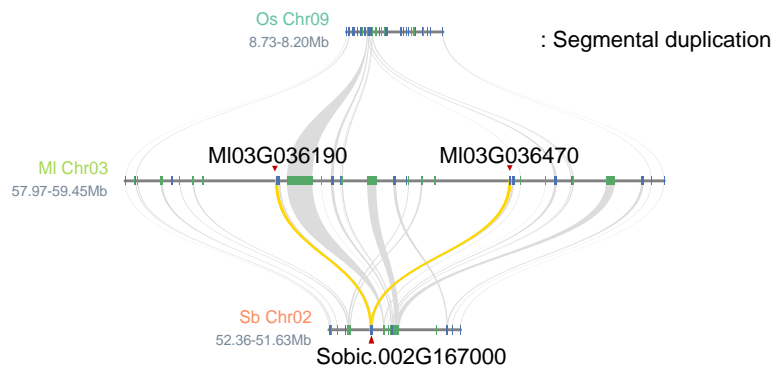

**Supplementary Fig. 41. Gene synteny of *M. lutarioriparius*, sorghum and rice PEPC genes.** Gene duplication of PEPC gene in *M. lutarioriparius* compared to sorghum.

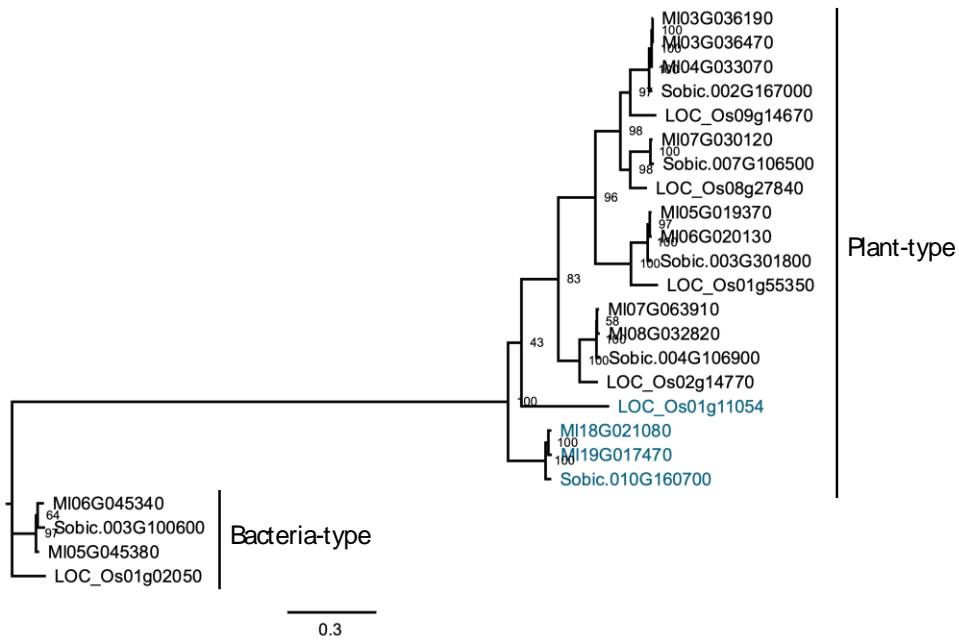

Supplementary Fig. 42. Maximum likelihood tree of *M. lutarioriparius*, sorghum and rice PEPC gene reconstructed using IQ-TREE software.

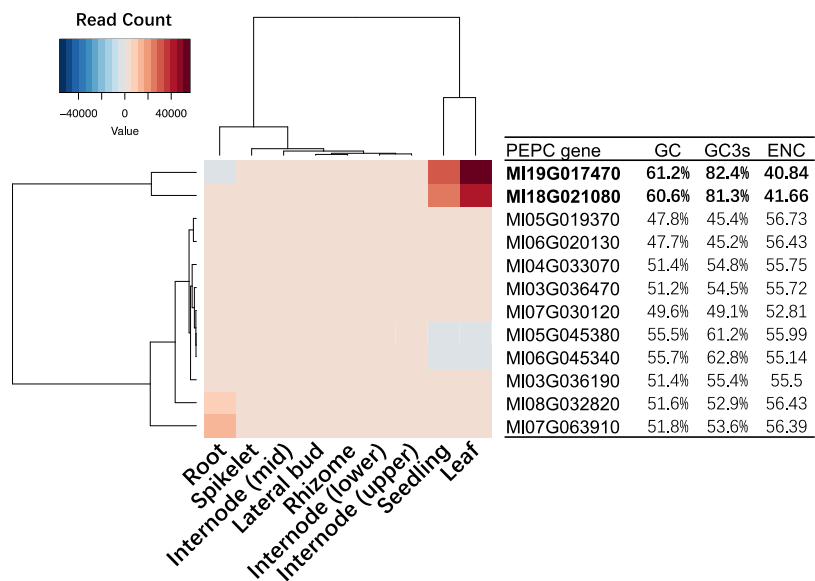

Supplementary Fig. 43. The heatmap of transcriptome expression of *M. lutarioriparius* PEPC genes among nine transcriptome samples and GC, GC3s and ENC of *M. lutarioriparius* PEPC genes. Bold characters represent putative C<sub>4</sub> genes.

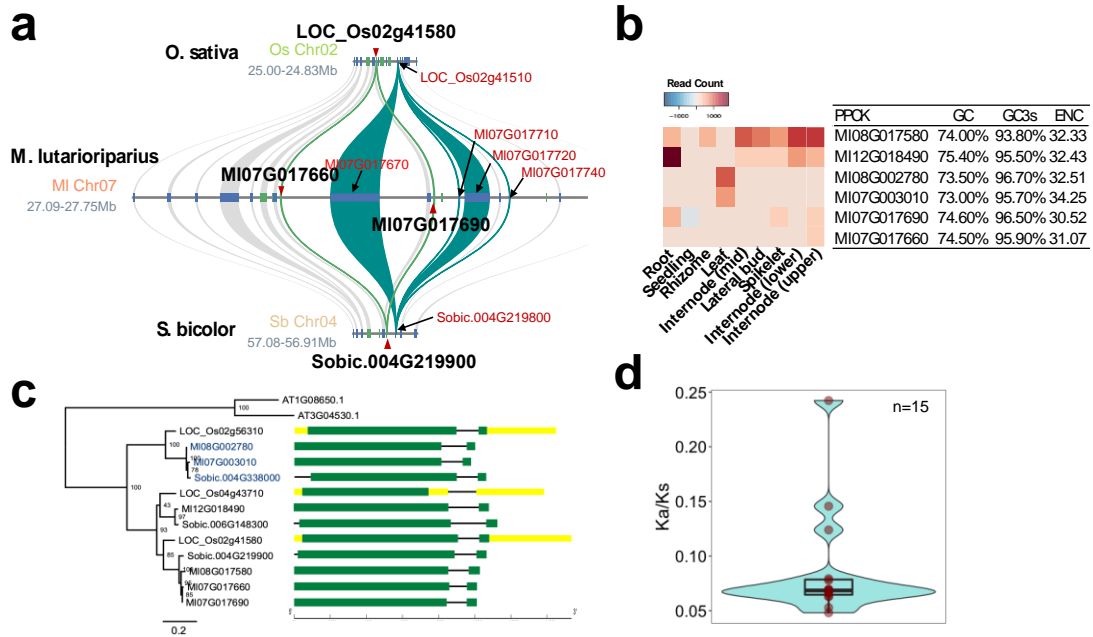

**Supplementary Fig. 44. PPCK genes of *M. lutarioriparius*.** **a** Gene synteny of PPCK genes among *M. lutarioriparius*, sorghum and rice. Black gene symbols represent PPCK genes. **b** The expression heatmap of *M. lutarioriparius* PPCK genes among nine transcriptome samples, with information of GC, GC3s and ENC. **c** Molecular phylogenetic tree and gene structure diagram of PPCK genes of *M. lutarioriparius* and sorghum. Green rectangles and black lines represent exons and introns, respectively. **d** Boxplot of Ka/Ks of *M. lutarioriparius* PPCK genes. In boxplot, the center line indicates the median, the lower and upper hinges represent the first and third quartiles, the upper whisker extends to the largest value less than 1.5× the interquartile range (IQR), the lower whisker extends to the smallest value at most 1.5× the IQR, the red points represent the data points. The number of data points used for plotting is 15.

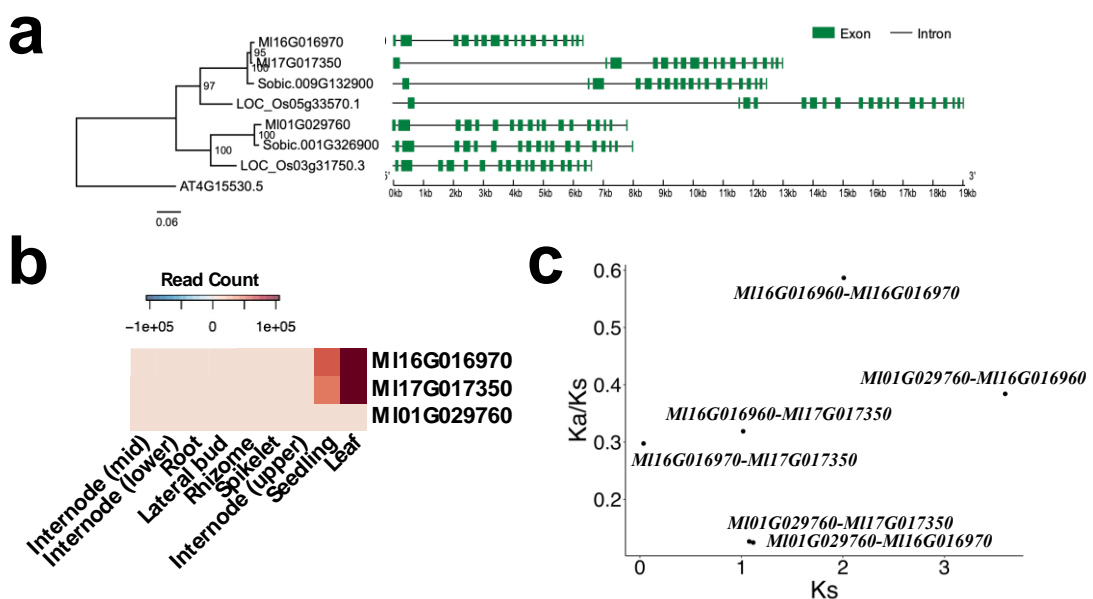

**Supplementary Fig. 45. PPDK genes of *M. lutarioriparius*.** **a** Molecular phylogenetic tree and gene structure diagram of PPDK genes of *M. lutarioriparius* and sorghum. Green

rectangles and black lines represent exons and introns, respectively. **b** The expression heatmap of *M. lutarioriparius* PPDK genes among nine transcriptome samples. **c** Distribution of  $Ka/Ks$  and  $Ks$  for *M. lutarioriparius* PPCK genes.

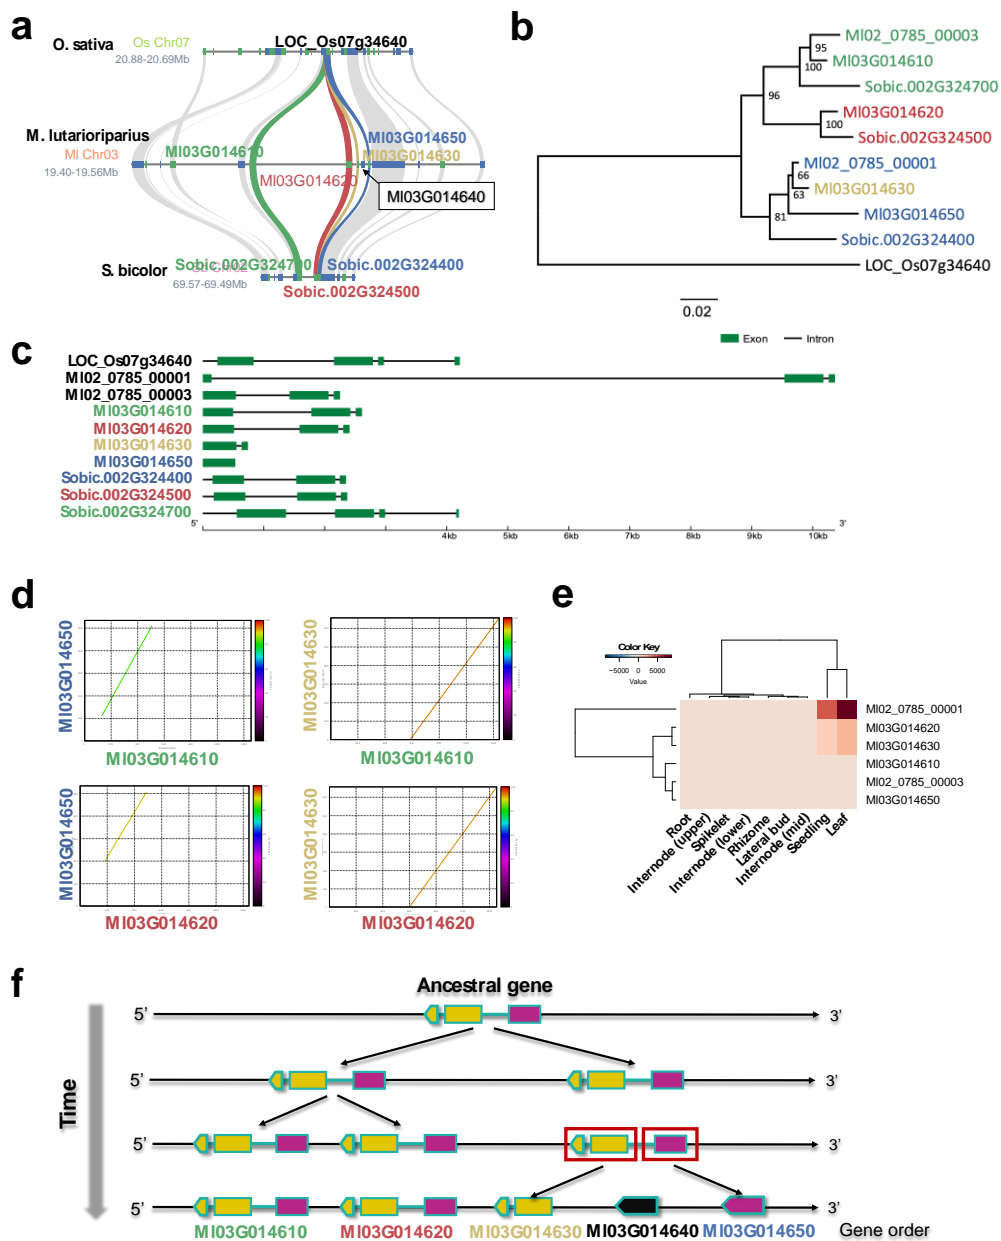

**Supplementary Fig. 46. PPDK-RP genes of *M. lutarioriparius*.** **a** Tandem duplications of *M. lutarioriparius* PPDK-RP genes. MI03G014640 isn't a PPDK-RP gene. **b** Phylogenetic tree of *M. lutarioriparius* and sorghum PPDK-RP genes were reconstructed using Maximum likelihood (ML) approach. Numbers at nodes indicate the percentage bootstrap scores from 1,000 replicates. **c** Gene structure diagram of *M. lutarioriparius* and sorghum PPDK-RP genes. Green rectangles and black lines represent exons and introns, respectively. **d** Sequence comparisons of *M. lutarioriparius* PPDK-RP genes. **e** The expression heatmap of PPDK-RP genes among nine transcriptome samples. **f** Inferred duplication model of *M. lutarioriparius* PPDK-RP genes.



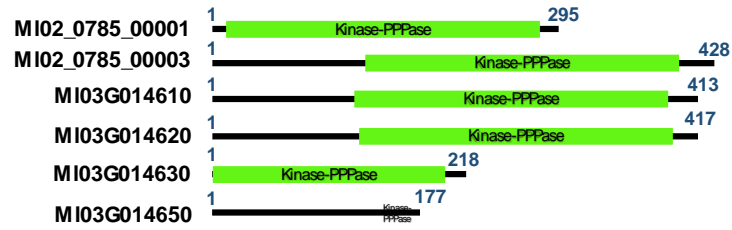

**Supplementary Fig. 47. Functional domain annotation of *M. lutarioriparius* PPDK-RP genes**

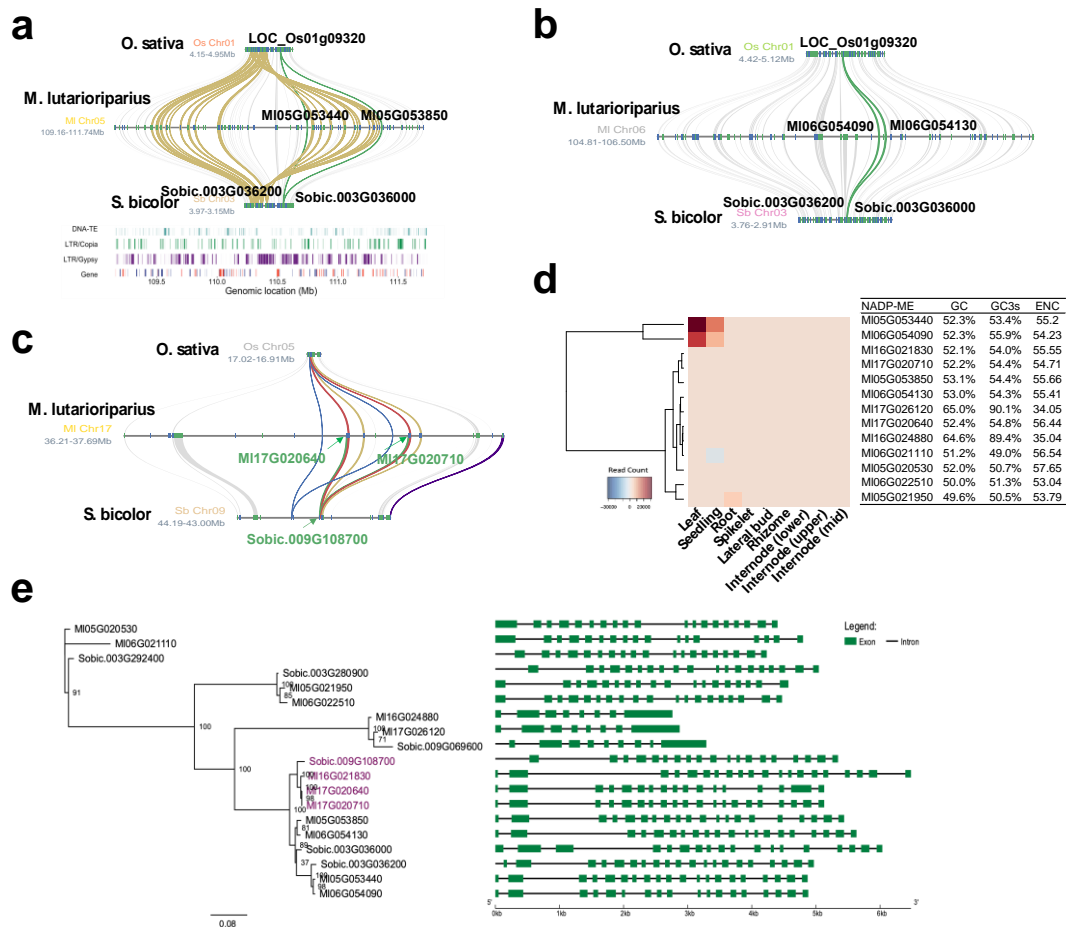

**Supplementary Fig. 48. NADP-ME genes in *M. lutarioriparius*.** **a** Tandem duplication of *M. lutarioriparius* NADP-ME genes MI05G053440 and MI05G053850. **b** Tandem duplication of *M. lutarioriparius* NADP-ME genes MI06G054090 and MI06G054130. **c** Segmental duplication of NADP-ME genes MI17G020640 and MI17G020710 only in *M. lutarioriparius*. **d** The expression heatmap of NADP-ME gene among 9 transcriptome samples, with the information of gene GC content, GC3s content and ENC. **e** Molecular phylogenetic tree and gene structure diagram of NADP-ME genes of *M. lutarioriparius* and sorghum.

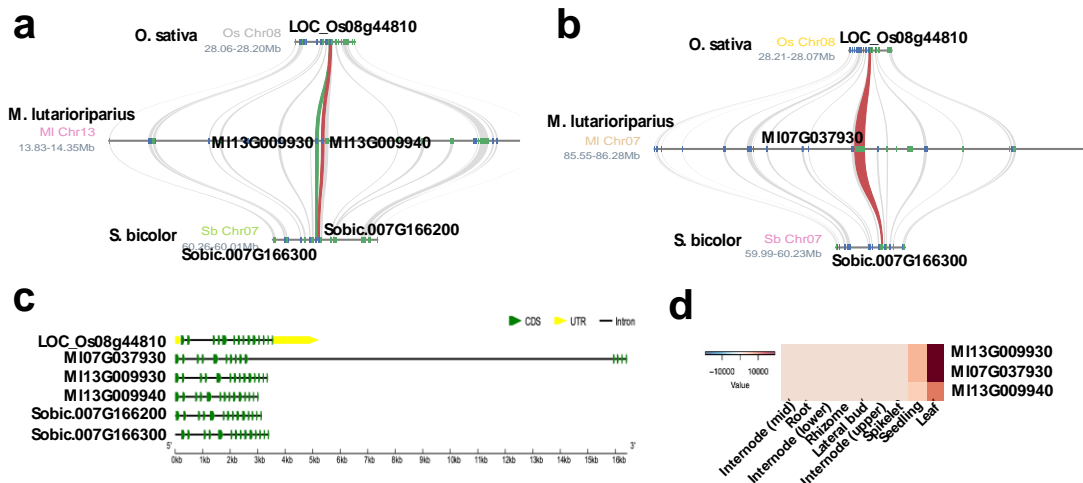

**Supplementary Fig. 49. NADP-MDH genes in *M. lutarioriparius*.** **a** Tandem duplication of *M. lutarioriparius* NADP-MDH genes MI13G009930 and MI13G009940. **b** Collinearity analysis of NADP-MDH gene MI07G037930. **c** Gene structure diagram of *M. lutarioriparius*, rice and sorghum NADP-MDH genes. The green rectangles and black lines represent exons and introns, respectively. **d** Expression heatmap of NADP-MDH genes among nine transcriptome samples

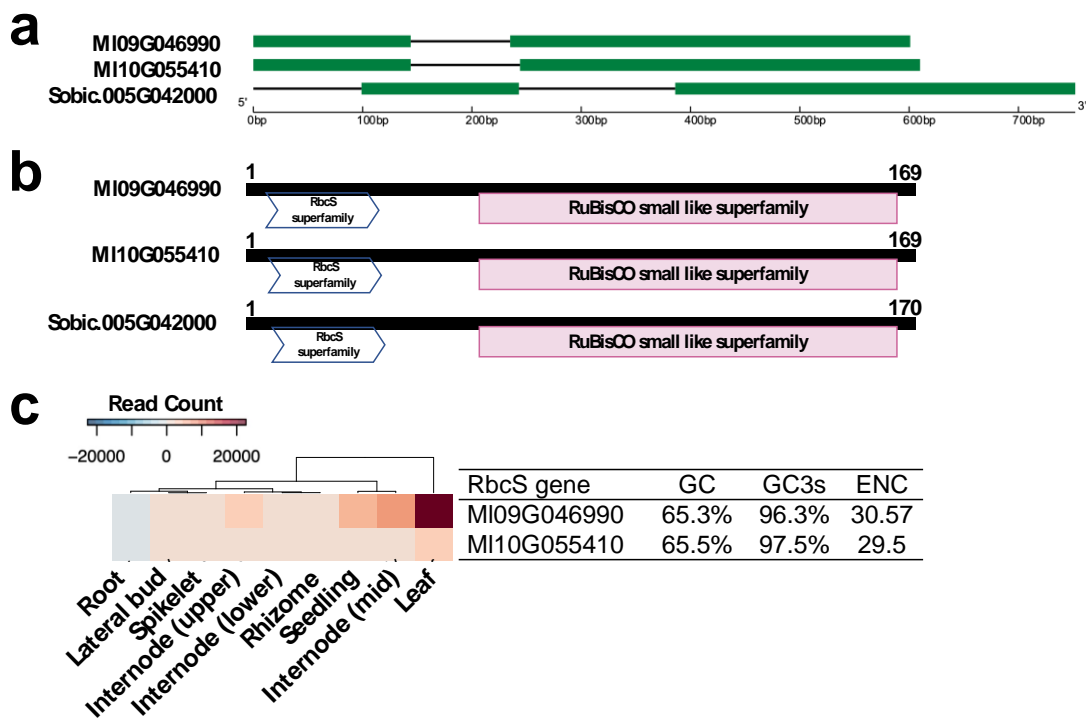

**Supplementary Fig. 50. RbcS genes in *M. lutarioriparius*.** **a** Gene structure of *M. lutarioriparius* and sorghum RbcS genes. The green rectangle and black lines represent exons and introns respectively. **b** The functional domain annotation of *M. lutarioriparius* and sorghum RbcS genes. **c** Expression heatmap of *M. lutarioriparius* RbcS genes among nine transcriptome samples, with information of GC content, GC3s and ENC of *M. lutarioriparius* RbcS genes.

**a**

*M. lutarioriparius* (Ref: *S. spontaneum*)  
*M. lutarioriparius* (Ref: *M. junceus*)

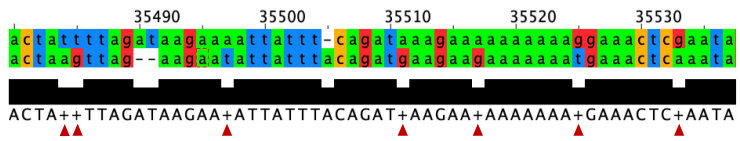**b**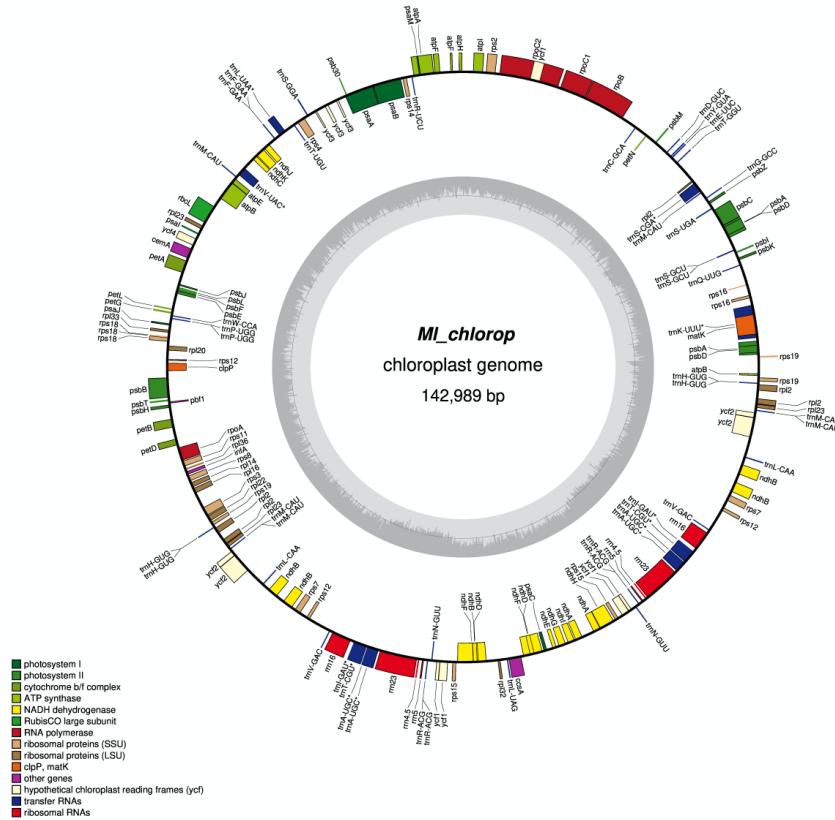

**Supplementary Fig. 51. Visualization of annotation of *M. lutarioriparius* chloroplast genome assembled in this study.** **a** Sequence comparison between two chloroplast genome assemblies of our sequencing accession. These two assemblies were reconstructed using the Illumina paired-end reads derived from whole genome sequencing through a baiting and iterative mapping approach, by which two references (*M. junceus* and *S. spontaneum*) were used. There are seven SNPs and one InDels between two *M. lutarioriparius* chloroplast genome assemblies. **b** The visualization of genome annotation of *M. lutarioriparius*.

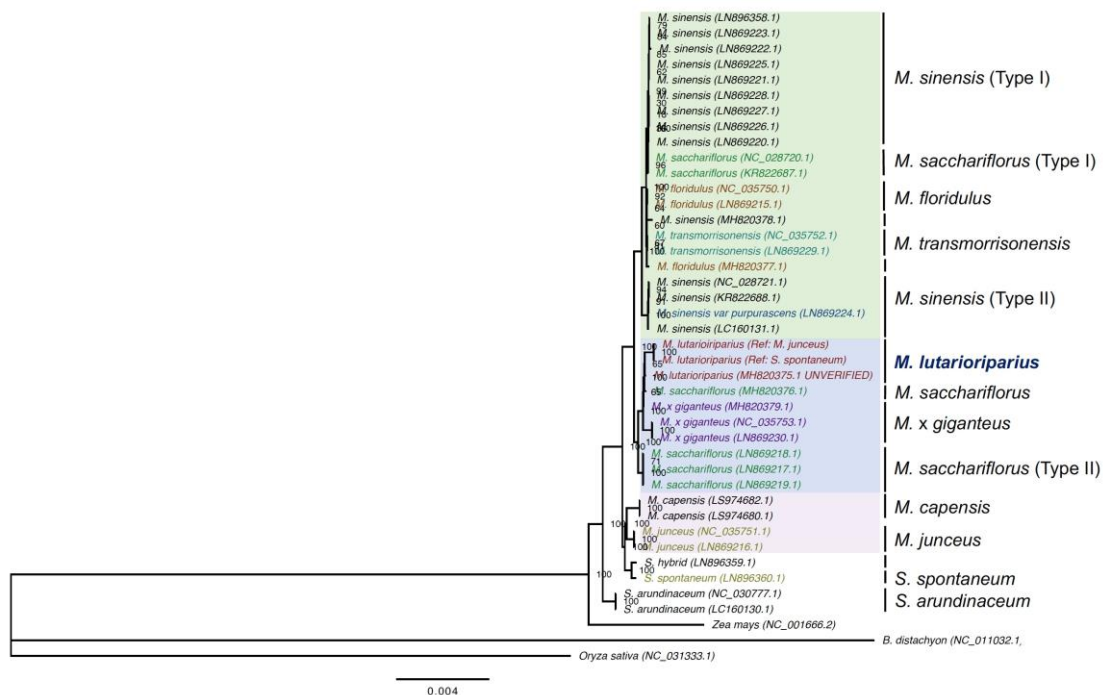

**Supplementary Fig. 52. Phylogenetic tree of genus *Miscanthus* reconstructed using Maximum Likelihood (ML) approach based on whole chloroplast genome sequence.** The chloroplast genome sequences were aligned using MAFFT<sup>4</sup> and the conserved sequence blocks were extracted using Gblock. The ML tree was reconstructed using IQ-TREE software with automatic best-fit model selection. The values of bootstrap support from 1,000 bootstrap replicates using IQ-TREE ultrafast bootstrap algorithm were indicated at nodes.

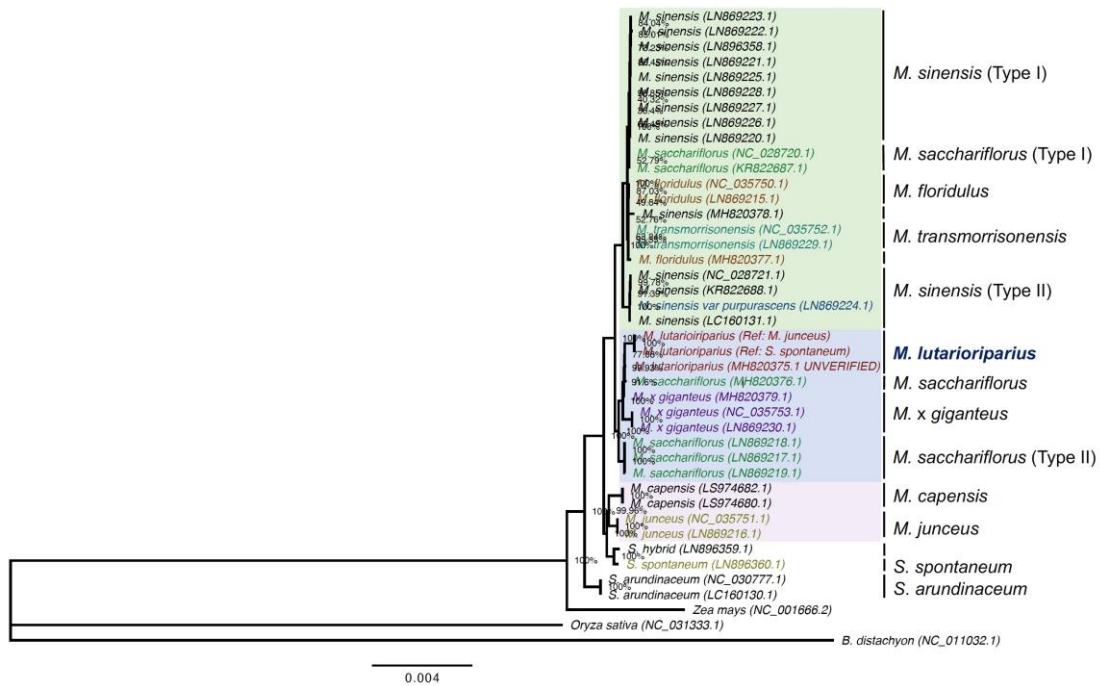

**Supplementary Fig. 53. Phylogenetic tree of genus *Miscanthus* reconstructed using Neighbor-Joining (NJ) method based on whole chloroplast genome sequence.** The chloroplast genome sequences were aligned using MAFFT<sup>4</sup> and the conserved sequence blocks were extracted using Gblock. The NJ tree was reconstructed using MEGA X<sup>5</sup> and 1,000 replicates bootstrap test were carried out. The values of bootstrap were indicated at nodes.

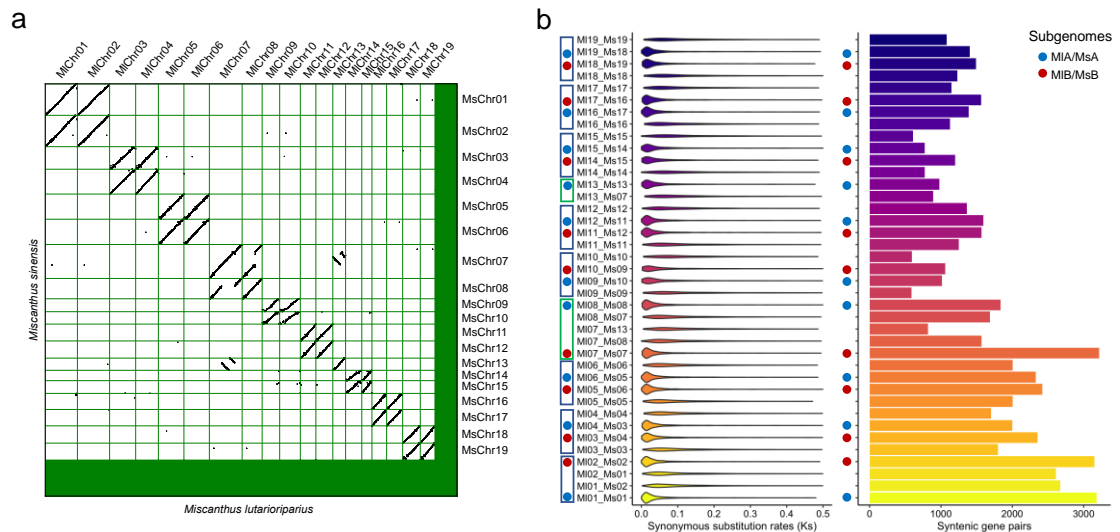

**Supplementary Fig. 54. Gene synteny analysis for *Miscanthus lutarioriparius* and *Miscanthus sinensis*.** **a** Gene synteny analysis for *Miscanthus lutarioriparius* and *Miscanthus sinensis*. **b** Violin plot of synonymous substitution rates of syntenic gene pairs of homoeologous chromosome pairs of *Miscanthus lutarioriparius* and *Miscanthus sinensis*. The right panel is the barplot of number of syntenic gene pairs of homologues chromosome pairs of *Miscanthus lutarioriparius* and *Miscanthus sinensis*.

**Supplementary Table 1. Genome survey by k-mer method.**

| Item             | Value          |
|------------------|----------------|
| raw_peak         | 23             |
| now_node         | 767,314,997    |
| low_kmer         | 1,300,729,763  |
| now_kmer         | 49,801,585,753 |
| cvg              | 23             |
| a[1/2]           | 0.0427106      |
| a[1]             | 0.216474       |
| b[1/2]           | 0.168431       |
| b[1]             | 0.158596       |
| Genome size (bp) | 2,191,630,000  |
| Repeat content   | 0.673          |
| Heterozygosity   | 0.0013         |

**Supplementary Table 2. Statistics of raw and clean Nanopore sequencing data.**

| Items                        | Raw data        | Clean data      |
|------------------------------|-----------------|-----------------|
| Number of sequences          | 13,992,488      | 10,037,103      |
| Sum of bases                 | 307,706,716,149 | 280,844,554,363 |
| N50 (bp)                     | 32,212          | 32,864          |
| N90 (bp)                     | 17,739          | 19,801          |
| Mean sequence length (bp)    | 21,990          | 27,980          |
| Maximum sequence length (bp) | 250,629         | 250,629         |
| Mean quality                 | 6.81            | 7.96            |

**Supplementary Table 3. The length distribution of clean Nanopore sequencing data.**

| Length (bp)   | Reads number | Total Length (bp) | Percent (%) | Average Length (bp) |
|---------------|--------------|-------------------|-------------|---------------------|
| 2,000~5,000   | 526,584      | 1,813,915,139     | 0.64        | 3,444.68            |
| 5,000~10,000  | 802,117      | 5,968,453,124     | 2.12        | 7,440.87            |
| 10,000~20,000 | 1,384,774    | 21,066,209,829    | 7.50        | 15,212.74           |
| 20,000~30,000 | 3,367,586    | 85,458,560,306    | 30.42       | 25,376.80           |
| 30,000~40,000 | 2,125,491    | 72,713,391,709    | 25.89       | 34,210.16           |
| 40,000~50,000 | 1,016,773    | 45,314,556,965    | 16.13       | 44,567.03           |
| 50,000~60,000 | 527,975      | 28,660,643,807    | 10.20       | 54,284.09           |
| 60,000~70,000 | 190,746      | 12,221,818,866    | 4.35        | 64,073.78           |
| 70,000~80,000 | 61,223       | 4,534,169,242     | 1.61        | 74,059.89           |
| >=80,000      | 33,834       | 3,092,835,376     | 1.10        | 91,412.05           |

**Supplementary Table 4. Statistics of Illumina DNA sequencing data.**

| Library     | Insert size<br>(bp) | Read length<br>(bp) | Raw data<br>(Gb) | Clean data<br>(Gb) | Sequence<br>depth (X) | GC% |
|-------------|---------------------|---------------------|------------------|--------------------|-----------------------|-----|
| ND_run448   | ~400                | 150                 | 82.86            | 67.59              | ~38                   | 46  |
| N500_run445 | ~472                | 250                 | 83.51            | 73.34              | ~41                   | 44  |
| N800_run445 | ~630                | 250                 | 39.37            | 31.59              | ~18                   | 44  |

**Supplementary Table 5. Statistics of the number of coding genes and InterProScan annotation for 19 pseudochromosomes.**

| Pseudo-chromosome | Length (bp)   | Number of coding gene | Number of genes<br>annotated by InterProScan |
|-------------------|---------------|-----------------------|----------------------------------------------|
| Chr01             | 144,624,297   | 5,347                 | 4,949                                        |
| Chr02             | 141,797,626   | 5,352                 | 4,966                                        |
| Chr03             | 122,330,789   | 4,322                 | 3,975                                        |
| Chr04             | 108,741,605   | 3,766                 | 3,529                                        |
| Chr05             | 119,689,306   | 4,236                 | 3,934                                        |
| Chr06             | 113,455,120   | 4,226                 | 3,917                                        |
| Chr07             | 150,811,276   | 5,429                 | 5,048                                        |
| Chr08             | 90,590,548    | 3,328                 | 3,130                                        |
| Chr09             | 115,207,000   | 2,902                 | 2,629                                        |
| Chr10             | 130,888,329   | 3,439                 | 3,129                                        |
| Chr11             | 75,828,887    | 2,579                 | 2,399                                        |
| Chr12             | 83,158,305    | 2,801                 | 2,598                                        |
| Chr13             | 74,599,310    | 2,129                 | 1,977                                        |
| Chr14             | 94,845,455    | 2,692                 | 2,426                                        |
| Chr15             | 61,782,722    | 1,673                 | 1,525                                        |
| Chr16             | 79,875,055    | 2,446                 | 2,298                                        |
| Chr17             | 78,232,433    | 2,650                 | 2,495                                        |
| Chr18             | 88,986,391    | 2,933                 | 2,650                                        |
| Chr19             | 81,019,333    | 2,492                 | 2,243                                        |
| Total             | 1,956,463,787 | 64,742                | 59,817                                       |
| Percentage        | 94.30%        | 94.75%                | 87.54%                                       |



**Supplementary Table 6. Sequence similarity of syntenic chromosomes.**

| Chromosome pair   | Number of base matches (bp) | Alignment block length (bp) | Sequence similarity (%) |
|-------------------|-----------------------------|-----------------------------|-------------------------|
| Chr01/Chr02       | 45,885,018                  | 137,212,078                 | 33.44                   |
| Chr03/Chr04       | 34,247,603                  | 103,561,892                 | 33.07                   |
| Chr05/Chr06       | 36,840,587                  | 110,083,315                 | 33.47                   |
| Chr07/Chr08/Chr13 | 51,482,594                  | 159,271,341                 | 32.32                   |
| Chr09/Chr10       | 36,841,772                  | 112,667,930                 | 32.70                   |
| Chr11/Chr12       | 25,346,765                  | 78,024,381                  | 32.49                   |
| Chr14/Chr15       | 17,924,374                  | 56,611,164                  | 31.66                   |
| Chr16/Chr17       | 23,439,445                  | 72,410,653                  | 32.37                   |
| Chr18/Chr19       | 24,733,803                  | 76,402,799                  | 32.37                   |

**Supplementary Table 7. Comparison of Hi-C anchoring results generated by LACHSIS and 3d-dna pipeline.**

| Software<br>Mode                       | 3d-dna pipeline |               |               |               |               | LACHESIS      |
|----------------------------------------|-----------------|---------------|---------------|---------------|---------------|---------------|
|                                        | Haploid         |               | Diploid       |               |               |               |
| Mis-join correction                    | iterative = 0   | iterative = 2 | iterative = 0 | iterative = 2 | iterative = 7 |               |
| Number of scaffolds                    | 163             | 3,996         | 163           | 3,996         | 5,743         | 919           |
| Total length (bp)                      | 2,310,174,655   | 2,311,039,655 | 1,903,956,058 | 1,923,638,092 | 1,929,321,746 | 2,074,797,027 |
| Minimum sequence length (bp)           | 1,000           | 1,000         | 1,000         | 1,000         | 1,000         | 16,938        |
| Maximum sequence length (bp)           | 188,012,908     | 169,516,646   | 147,938,815   | 144,831,376   | 136,530,390   | 150,811,276   |
| Average sequence length (bp)           | 14,172,851      | 578,338       | 11,680,712    | 481,391       | 335,943       | 2,257,668     |
| N50 length (bp)                        | 102,464,518     | 110,158,741   | 83,487,897    | 91,965,924    | 86,557,408    | 113,455,120   |
| N90 length (bp)                        | 58,123,791      | 88,371,468    | 52,571,489    | 69,999,508    | 12,483,367    | 74,599,310    |
| GC content (%)                         | 45.44           | 45.43         | 45.43         | 45.40         | 45.38         | 45.46         |
| NoN (bp)                               | 2,308,788,550   | 2,308,959,719 | 1,903,384,871 | 1,922,291,545 | 1,927,392,424 | 2,074,589,547 |
| Proportion of longest 19 scaffolds (%) | 88.038          | 94.431        | 87.842        | 93.926        | 87.817        | 94.297        |
| Complete BUSCOs (C)                    |                 | 1337 (97.2%)  | 1335 (97.1%)  | 1336 (97.2%)  | 1332 (96.9%)  | 1339 (97.4%)  |
| Complete and single-copy BUSCOs (S)    |                 | 462 (33.6%)   | 550 (40.0%)   | 500 (36.4%)   | 532 (38.7%)   | 480 (34.9%)   |
| Complete and duplicated BUSCOs (D)     |                 | 875 (63.6%)   | 785 (57.1%)   | 836 (60.8%)   | 800 (58.2%)   | 859 (62.5%)   |
| Fragmented BUSCOs (F)                  |                 | 8 (0.6%)      | 9 (0.7%)      | 7 (0.5%)      | 8 (0.6%)      | 5 (0.4%)      |
| Missing BUSCOs (M)                     |                 | 30 (2.2%)     | 31 (2.2%)     | 32 (2.3%)     | 35 (2.5%)     | 31 (2.2%)     |
| LTR Assembly Index (LAI)               |                 | 7.56          |               | 9.06          | 7.99          | 12.11         |
| Illumina PE overall mapping rate (%)   |                 | 99.94         | 99.77         | 99.76         | 99.74         | 99.82         |
| Illumina PE properly paired rate (%)   |                 | 97.43         | 95.51         | 95.52         | 95.50         | 96.28         |

**Supplementary Table 8. Alignment summary of mRNA-Seq data.**

| Tissues           | Total reads<br>pairs | Overall alignment rate (%) | Read pairs aligned concordantly<br>exactly 1 time | Read pairs aligned<br>concordantly >1 time | Read pairs aligned<br>concordantly 0 time |
|-------------------|----------------------|----------------------------|---------------------------------------------------|--------------------------------------------|-------------------------------------------|
| Rhizome           | 57,557,879           | 94.99                      | 41,524,903 (72.14%)                               | 11,434,473 (19.87%)                        | 4,598,503 (7.99%)                         |
| Bud               | 46,439,831           | 94.83                      | 35,468,029 (76.37%)                               | 7,074,581 (15.23%)                         | 3,897,221 (8.39%)                         |
| Internode (lower) | 31,172,738           | 95.37                      | 24,948,230 (80.03%)                               | 4,114,803 (13.20%)                         | 2,109,705 (6.77%)                         |
| Leaf              | 20,935,960           | 82.55                      | 8,655,418 (41.34%)                                | 6,266,168 (29.93%)                         | 6,014,374 (28.73%)                        |
| Internode (mid)   | 31,490,989           | 95.35                      | 25,280,984 (80.28%)                               | 3,993,757 (12.68%)                         | 2,216,248 (7.04%)                         |
| Root              | 29,081,420           | 93.01                      | 21,844,282 (75.11%)                               | 4,339,072 (14.92%)                         | 2,898,066 (9.97%)                         |
| Seedling          | 14,920,573           | 89.78                      | 6,288,476 (42.15%)                                | 5,980,377 (40.08%)                         | 2,651,720 (17.77%)                        |
| Spikelet          | 11,566,744           | 89.24                      | 4,756,289 (41.12%)                                | 5,169,620 (44.69%)                         | 1,640,835 (14.19%)                        |
| Internode (upper) | 31,285,582           | 95.25                      | 24,913,488 (79.63%)                               | 4,143,598 (13.24%)                         | 2,228,496 (7.12%)                         |

**Supplementary Table 9. The average GC content among 8 species.**

| Species                   | Average GC content (%) | Genome size (Mb) |
|---------------------------|------------------------|------------------|
| <i>A. thaliana</i>        | 36                     | 119.67           |
| <i>B. distachyon</i>      | 46.33                  | 271.16           |
| <i>O. sativa</i>          | 43.55                  | 374.47           |
| <i>S. italica</i>         | 45.60                  | 405.74           |
| <i>Z. mays</i>            | 46.20                  | 2,135.08         |
| <i>S. bicolor</i>         | 41.81                  | 708.86           |
| <i>S. spontaneum</i>      | 44.81                  | 3,140.62         |
| <i>M. lutarioriparius</i> | 45.46                  | 2,074.8          |

**Supplementary Table 10. Chromosome position of potential centromeric regions.**

| Pseudo-chromosome | Start (bp) | End (bp)   | Length (bp) |
|-------------------|------------|------------|-------------|
| Chr01             | 74,439,407 | 76,426,273 | 1,986,866   |
| Chr02             | 72,472,025 | 76,907,038 | 4,435,013   |
| Chr03             | 68,117,061 | 69,229,757 | 1,112,696   |
| Chr04             | 60,516,868 | 62,299,598 | 1,782,730   |
| Chr05             | 65,512,690 | 66,263,644 | 750,954     |
| Chr06             | 63,571,080 | 66,730,587 | 3,159,507   |
| Chr07             | 60,512,231 | 61,250,233 | 738,002     |
| Chr08             | 54,518,937 | 56,187,833 | 1,668,896   |
| Chr09             | 51,573,634 | 59,132,349 | 7,558,715   |
| Chr10             | 60,969,865 | 68,653,332 | 7,683,467   |
| Chr11             | 54,544,432 | 55,417,084 | 872,652     |
| Chr12             | 57,919,498 | 58,464,632 | 545,134     |
| Chr13             | 39,266,917 | 40,054,122 | 787,205     |
| Chr14             | 41,831,481 | 47,480,766 | 5,649,285   |
| Chr15             | 27,631,199 | 35,271,239 | 7,640,040   |
| Chr16             | 38,103,434 | 38,357,246 | 253,812     |
| Chr17             | 44,674,089 | 45,750,082 | 1,075,993   |
| Chr18             | 45,599,654 | 46,192,743 | 593,089     |
| Chr19             | 38,912,793 | 39,019,645 | 106,852     |

**Supplementary Table 11. Statistics of predicted gene models.**

| Item                                      | Value           |
|-------------------------------------------|-----------------|
| <b>Genes</b>                              |                 |
| Total length (bp)                         | 270,509,919     |
| Number of gene models                     | 68,328          |
| Mean gene length (bp)                     | 3,959           |
| Mean exon number per gene                 | 4.77            |
| Maximum exon number of genes              | 78              |
| Number of single-exon gene                | 17,400          |
| Number of genes annotated by InterProScan | 63,076 (93.21%) |
| <b>CDSs</b>                               |                 |
| Total length (bp)                         | 83,031,134      |
| Number of CDS                             | 68,328          |
| Minimum CDS length (bp)                   | 150             |
| Maximum CDS length (bp)                   | 17,073          |
| Mean CDS length (bp)                      | 1,215           |
| Median CDS length (bp)                    | 1,008           |
| <b>Introns</b>                            |                 |
| Total length (bp)                         | 187,547,029     |
| Number of introns                         | 257,898         |
| Mean number per transcript                | 3.77            |
| Mean intron length (bp)                   | 727             |
| Minimum intron length (bp)                | 21              |
| Maximum intron length (bp)                | 199,504         |

**Supplementary Table 12. BUSCO notation assessment of predicted genes.**

| Item                                | Value         |
|-------------------------------------|---------------|
| Complete BUSCOs (C)                 | 1,350 (98.2%) |
| Complete and single-copy BUSCOs (S) | 375 (27.3%)   |
| Complete and duplicated BUSCOs (D)  | 975 (70.9%)   |
| Fragmented BUSCOs (F)               | 17 (1.2%)     |
| Missing BUSCOs (M)                  | 8 (0.6%)      |
| Total BUSCO groups searched         | 1,375         |

**Supplementary Table 13. Comparison of GC content of coding sequence among 8 species.**

| Species                   | CDS count | GC mean (%) | GC median (%) | GC3s mean (%) | GC3s median (%) |
|---------------------------|-----------|-------------|---------------|---------------|-----------------|
| <i>A. thaliana</i>        | 27,416    | 44.45       | 44.20         | 40.53         | 39.80           |
| <i>B. distachyon</i>      | 34,130    | 55.60       | 56.39         | 60.00         | 62.62           |
| <i>O. sativa</i>          | 39,049    | 57.60       | 57.76         | 62.70         | 64.34           |
| <i>S. italica</i>         | 34,584    | 56.50       | 57.43         | 62.60         | 65.01           |
| <i>Z. mays</i>            | 39,498    | 54.80       | 56.31         | 60.00         | 63.18           |
| <i>S. bicolor</i>         | 34,129    | 56.74       | 55.90         | 63.36         | 60.40           |
| <i>S. spontaneum</i>      | 112,788   | 56.40       | 57.03         | 61.70         | 63.68           |
| <i>M. lutarioriparius</i> | 68,328    | 56.40       | 57.32         | 63.30         | 65.09           |

**Supplementary Table 14. Statistics of repeat elements.**

|                            | Number of elements | Length occupied (bp) | Genome proportion (%) |
|----------------------------|--------------------|----------------------|-----------------------|
| LINEs                      | 47,965             | 25,046,979           | 1.21                  |
| SINEs                      | 20,278             | 3,383,723            | 0.16                  |
| LTR elements               | 634,807            | 970,568,697          | 46.78                 |
| DNA elements               | 495,461            | 200,045,511          | 9.64                  |
| Unclassified               | 396,649            | 136,871,521          | 6.6                   |
| Total interspersed repeats | 1,595,160          | 1,335,916,431        | 64.39                 |
| Satellites                 | 2,560              | 18,683,054           | 0.9                   |

**Supplementary Table 15. Statistics of MITEs.**

| MITEs               | Value     |
|---------------------|-----------|
| Total length (bp)   | 4,836,422 |
| Genome proportion   | 0.23%     |
| Mean length         | 253.72    |
| Number of MITE      | 19,062    |
| Maximum length (bp) | 800       |
| Minimum length (bp) | 60        |

**Supplementary Table 16. Statistics of tandem repeats.**

| Item                  | Value      |
|-----------------------|------------|
| Total length (bp)     | 77,598,536 |
| Genome proportion (%) | 3.740      |
| Average length (bp)   | 149.812    |
| Count                 | 517,973    |
| Maximum length (bp)   | 131,208    |
| Minimum length (bp)   | 25         |

**Supplementary Table 17. Cellulose synthase encoding genes in *M. lutarioriparius*.**

| Gene ID         | CDSL (bp) | Sb syntenic gene | CDSL (bp) | Os syntenic gene |
|-----------------|-----------|------------------|-----------|------------------|
| MI01G046000     | 3,252     | Sobic.001G224300 | 3,177     | LOC_Os10g32980   |
| MI01G069060     | 3,090     | Sobic.001G045700 | 3,243     | LOC_Os03g59340   |
| MI01G069240     | 3,294     |                  | 3,243     | LOC_Os03g59340   |
| MI01G072610     | 3,273     | Sobic.001G021500 | 3,273     | LOC_Os03g62090   |
| MI02_0088_00001 | 3,189     | Sobic.009G063400 | 3,222     | LOC_Os05g08370   |
| MI02_0380_00007 | 3,183     |                  |           |                  |
| MI02G045300     | 3,246     | Sobic.001G224300 | 3,177     | LOC_Os10g32980   |
| MI02G069830     | 3,258     | Sobic.001G045700 | 3,243     | LOC_Os03g59340   |
| MI02G072870     | 3,273     | Sobic.001G021500 | 3,273     | LOC_Os03g62090   |
| MI03G030460     | 3,159     | Sobic.002G205500 | 3,150     | LOC_Os09g25490   |
| MI03G043090     | 3,216     | Sobic.002G118700 | 3,366     | LOC_Os07g24190   |
| MI03G045870     | 3,309     | Sobic.002G094600 | 3,303     | LOC_Os07g14850   |
| MI04G028220     | 3,156     | Sobic.002G205500 | 3,150     | LOC_Os09g25490   |
| MI04G039710     | 3,264     | Sobic.002G118700 | 3,366     | LOC_Os07g24190   |
| MI04G043020     | 3,294     |                  |           |                  |
| MI04G043640     | 3,246     | Sobic.002G075500 | 3,246     | LOC_Os07g10770   |
| MI05G020050     | 2,949     | Sobic.003G296400 | 2,943     | LOC_Os01g54620   |
| MI05G051870     | 3,225     |                  |           |                  |
| MI06G020630     | 2,946     | Sobic.003G296400 | 2,943     | LOC_Os01g54620   |
| MI06G052370     | 3,222     |                  |           |                  |
| MI16G025580     | 2,808     | Sobic.009G063400 | 3,222     | LOC_Os05g08370   |
| MI17G026950     | 3,219     | Sobic.009G063400 | 3,222     | LOC_Os05g08370   |
| MI18G014840     | 5,616     |                  |           |                  |
| MI18G015060     | 3,204     |                  |           |                  |
| MI18G017550     | 2,592     | Sobic.010G183700 | 2,649     | LOC_Os06g39970   |
| MI19G012920     | 3,204     |                  |           |                  |
| MI19G014510     | 2,433     | Sobic.010G183700 | 2,649     | LOC_Os06g39970   |

CDSL: coding sequence length. Sb: *Sorghum bicolor*. Os: *Oryza sativa*.

**Supplementary Table 18. Comparative numbers of *CesA* and *Csl* gene families of *M. lutarioriparius*, maize, rice and *Arabidopsis*.**

| Gene          | <i>M. lutarioriparius</i> | <i>O. sativa</i> | <i>Z. mays</i> | <i>A. thaliana</i> |
|---------------|---------------------------|------------------|----------------|--------------------|
| <i>CslA</i>   | 18                        | 9                | 10             | 9                  |
| <i>CslB</i>   | 0                         | 0                | 0              | 6                  |
| <i>CslC</i>   | 14                        | 6                | 8              | 5                  |
| <i>CslD</i>   | 16                        | 5                | 5              | 5                  |
| <i>CslF</i>   | 27                        | 9                | 7              | 0                  |
| <i>CslH</i>   | 5                         | 3                | 0              | 0                  |
| <i>CslG/E</i> | 10                        | 3                | 3              | 4                  |
| <i>CesA</i>   | 27                        | 11               | 20             | 9                  |
| Total         | 117                       | 46               | 53             | 38                 |

The data of gene count of sorghum, maize, rice and *Arabidopsis* was derived from cell wall genomics (<https://cellwall.genomics.purdue.edu/families/index.html>).

**Supplementary Table 19. Comparative numbers of gene families involved in photosynthesis between *M. lutarioriparius* and sorghum.**

| Genes    | Name                                           | <i>M. lutarioriparius</i> | <i>S. bicolor</i> <sup>6</sup> |
|----------|------------------------------------------------|---------------------------|--------------------------------|
| CA       | Carbonic anhydrase                             | 10 (4)                    | 5 (2)                          |
| PEPC     | phosphoenolpyruvate carboxylase                | 12 (2)                    | 6 (1)                          |
| PPCK     | Phosphoenolpyruvate carboxylase kinase         | 6 (2)                     | 3 (1)                          |
| PPDK     | Pyruvate phosphate dikinase                    | 3 (2)                     | 2 (1)                          |
| PPDK-RP  | Pyruvate phosphate dikinase regulatory protein | 6 (3)                     | 3 (1)                          |
| NADP-ME  | NADP-Malic enzyme                              | 13 (2)                    | 6 (1)                          |
| NADP-MDH | NADP-Malate dehydrogenase                      | 3 (2)                     | 2 (1)                          |
| RbcS     | RbBPCase small-subunit                         | 2 (1)                     | 1 (1)                          |

The number in the parentheses indicates the putative C<sub>4</sub> genes in that gene family.



**Supplementary Table 20. CA enzyme genes information.**

| CA enzyme gene     | GL (bp) | CDSL (bp) | Exon num. | Sb collinear gene       | GL (bp) | CDSL (bp) | Os collinear gene |
|--------------------|---------|-----------|-----------|-------------------------|---------|-----------|-------------------|
| MI03G027080        | 4,969   | 1,446     | 10        | Sobic.002G230100        | 4,823   | 1,014     | LOC_Os09g28910    |
| MI04G024880        | 3,071   | 702       | 7         | Sobic.002G230100        | 4,823   | 1,014     | LOC_Os09g28910    |
| <b>MI05G027550</b> | 7,553   | 1,338     | 13        | <b>Sobic.003G234200</b> | 10,440  | 1,371     | LOC_Os01g45274    |
| <b>MI06G028470</b> | 6,672   | 1,338     | 13        | <b>Sobic.003G234200</b> | 10,440  | 1,371     | LOC_Os01g45274    |
| <b>MI05G027540</b> | 4,859   | 609       | 7         | <b>Sobic.003G234400</b> | 4,749   | 615       | LOC_Os01g45274    |
| <b>MI06G028460</b> | 4,459   | 702       | 7         | <b>Sobic.003G234400</b> | 4,749   | 615       | LOC_Os01g45274    |
| MI05G027530        | 2,207   | 609       | 6         | Sobic.003G234500        | 2,986   | 609       | LOC_Os01g45274    |
| MI06G028450        | 2,259   | 609       | 6         | Sobic.003G234500        | 2,986   | 609       | LOC_Os01g45274    |
| MI05G027520        | 3,252   | 747       | 8         | Sobic.003G234600        | 4,750   | 771       | LOC_Os01g45274    |
| MI06G028440        | 3,719   | 753       | 7         | Sobic.003G234600        | 4,750   | 771       | LOC_Os01g45274    |

CDSL: coding sequence length. GL: gene length. Sb: *Sorghum bicolor*. Os: *Oryza sativa*. Bold characters represent putative C<sub>4</sub> genes.

**Supplementary Table 21. Information of PEPC enzyme gene in *M. lutarioriparius*.**

| PEPC gene          | GL (bp) | CDSL (bp) | Exon num. | Sb collinear gene       | GL (bp) | CDSL (bp) | Os collinear gene |
|--------------------|---------|-----------|-----------|-------------------------|---------|-----------|-------------------|
| MI03G036190        | 5,069   | 2,736     | 11        | Sobic.002G167000        | 5,632   | 2,904     |                   |
| MI03G036470        | 5,072   | 2,889     | 11        | Sobic.002G167000        | 5,632   | 2,904     |                   |
| MI04G033070        | 5,063   | 2,904     | 10        | Sobic.002G167000        | 5,632   | 2,904     | LOC_Os09g14670    |
| MI05G045380        | 8,760   | 2,946     | 18        | Sobic.003G100600        | 8,881   | 3,117     | LOC_Os01g02050    |
| MI06G045340        | 7,433   | 2,817     | 18        | Sobic.003G100600        | 8,881   | 3,117     | LOC_Os01g02050    |
| MI05G019370        | 11,863  | 2,901     | 10        | Sobic.003G301800        | 7,610   | 2,901     | LOC_Os01g55350    |
| MI06G020130        | 6,194   | 2,901     | 9         | Sobic.003G301800        | 7,610   | 2,901     | LOC_Os01g55350    |
| MI07G063910        | 6,706   | 2,883     | 10        | Sobic.004G106900        | 6,977   | 2,883     | LOC_Os02g14770    |
| MI08G032820        | 6,719   | 2,883     | 10        | Sobic.004G106900        | 6,977   | 2,883     | LOC_Os02g14770    |
| MI07G030120        | 4,927   | 2,874     | 10        | Sobic.007G106500        | 5,616   | 2,895     | LOC_Os08g27840    |
| <b>MI18G021080</b> | 7,426   | 2,889     | 10        | <b>Sobic.010G160700</b> | 6,647   | 3,087     | LOC_Os01g11054    |
| <b>MI19G017470</b> | 7,673   | 2,886     | 10        | <b>Sobic.010G160700</b> | 6,647   | 3,087     | LOC_Os01g11054    |

CDSL: coding sequence length. GL: gene length. Sb: *Sorghum bicolor*. Os: *Oryza sativa*. Bold characters represent putative C<sub>4</sub> genes.

**Supplementary Table 22. Information of *M. lutarioriparius* PPCK genes.**

| PPCK               | GL (bp) | CDSL (bp) | Exon num. | Sb collinear gene       | GL (bp) | CDSL (bp) | Os collinear gene |
|--------------------|---------|-----------|-----------|-------------------------|---------|-----------|-------------------|
| <b>MI07G003010</b> | 978     | 861       | 2         | <b>Sobic.004G338000</b> | 1,749   | 855       | LOC_Os02g56310    |
| MI07G017660        | 1,012   | 915       | 2         | Sobic.004G219900        | 1,612   | 924       | LOC_Os02g41580    |
| MI07G017690        | 1,011   | 900       | 2         | Sobic.004G219900        | 1,612   | 924       | LOC_Os02g41580    |
| MI08G017580        | 1,028   | 915       | 2         | Sobic.004G219900        | 1,612   | 924       | LOC_Os02g41580    |
| <b>MI08G002780</b> | 1,001   | 861       | 2         | <b>Sobic.004G338000</b> | 1,749   | 855       | LOC_Os02g56310    |
| MI12G018490        | 1,080   | 912       | 2         | Sobic.006G148300        | 1,997   | 900       | LOC_Os04g43710    |

CDSL: coding sequence length. GL: gene length. Sb: *Sorghum bicolor*. Os: *Oryza sativa*. Bold characters represent putative C4 genes.

**Supplementary Table 23. Information of *M. lutarioriparius* PPDK genes.**

| PPDK               | GL (bp) | CDSL (bp) | Exon num. | Sb collinear gene       | GL (bp) | CDSL (bp) | Os collinear gene |
|--------------------|---------|-----------|-----------|-------------------------|---------|-----------|-------------------|
| MI01G029760        | 7,855   | 2,703     | 18        | Sobic.001G326900        | 8,494   | 2,730     | LOC_Os03g31750    |
| <b>MI16G016970</b> | 6,354   | 2,649     | 17        | <b>Sobic.009G132900</b> | 12,748  | 2,847     | LOC_Os05g33570    |
| <b>MI17G017350</b> | 13,017  | 2,844     | 18        | <b>Sobic.009G132900</b> | 12,748  | 2,847     | LOC_Os05g33570    |

CDSL: coding sequence length. GL: gene length. Sb: *Sorghum bicolor*. Os: *Oryza sativa*. Bold characters represent putative C<sub>4</sub> genes.

**Supplementary Table 24. Information of *M. lutarioriparius* PPDK-RP genes.**

| PPDK-RP                | GL (bp) | CDSL (bp) | Exon num. | Sorghum ortholog        | GL (bp) | CDSL (bp) | Rice ortholog  |
|------------------------|---------|-----------|-----------|-------------------------|---------|-----------|----------------|
| <b>MI02_0785_00001</b> | 10,365  | 888       | 3         | <b>Sobic.002G324400</b> | 2,507   | 1,290     | LOC_Os07g34640 |
| MI02_0785_00003        | 2,251   | 1,287     | 3         | Sobic.002G324700        | 4,662   | 1,587     | LOC_Os07g34640 |
| MI03G014610            | 2,611   | 1,242     | 3         | Sobic.002G324700        | 4,662   | 1,587     | LOC_Os07g34640 |
| MI03G014620            | 2,407   | 1,254     | 3         | Sobic.002G324500        | 3,072   | 1,260     | LOC_Os07g34640 |
| <b>MI03G014630</b>     | 740     | 657       | 2         | <b>Sobic.002G324400</b> | 2,507   | 1,290     | LOC_Os07g34640 |
| <b>MI03G014650</b>     | 533     | 534       | 1         | <b>Sobic.002G324400</b> | 2,507   | 1,290     | LOC_Os07g34640 |

CDSL: coding sequence length. GL: gene length. Bold characters represent putative C<sub>4</sub> genes.

**Supplementary Table 25. The information of *M. lutarioriparius* NADP-ME genes.**

| NADP-ME            | GL (bp) | CDSL (bp) | Exon number | Sorghum collinear gene  | GL (bp) | CDSL (bp) |
|--------------------|---------|-----------|-------------|-------------------------|---------|-----------|
| MI05G053850        | 8,365   | 1,950     | 20          | Sobic.003G036000        | 6,107   | 2,124     |
| MI06G054130        | 15,675  | 1,929     | 20          | Sobic.003G036000        | 6,107   | 2,124     |
| <b>MI05G053440</b> | 6,412   | 1,908     | 20          | <b>Sobic.003G036200</b> | 5,447   | 1,911     |
| <b>MI06G054090</b> | 13,947  | 1,686     | 18          | <b>Sobic.003G036200</b> | 5,447   | 1,911     |
| MI05G021950        | 2,541   | 1,698     | 18          | Sobic.003G280900        | 5,691   | 1,782     |
| MI06G022510        | 121,22  | 1,782     | 19          | Sobic.003G280900        | 5,691   | 1,782     |
| MI05G020530        | 4,401   | 1,962     | 19          | Sobic.003G292400        | 4,527   | 1,782     |
| MI06G021110        | 10,361  | 1,719     | 17          | Sobic.003G292400        | 4,527   | 1,782     |
| MI16G024880        | 21,405  | 1,713     | 8           | Sobic.009G069600        | 3,624   | 1,713     |
| MI17G026120        | 28,537  | 1,713     | 8           | Sobic.009G069600        | 3,624   | 1,713     |
| MI16G021830        | 19,406  | 1,953     | 20          | Sobic.009G108700        | 5,651   | 1,959     |
| MI17G020640        | 24,680  | 1,857     | 17          | Sobic.009G108700        | 5,651   | 1,959     |
| MI17G020710        | 26,581  | 1,911     | 20          | Sobic.009G108700        | 5,651   | 1,959     |

CDSL: coding sequence length. GL: gene length. Bold characters represent putative C<sub>4</sub> genes.

**Supplementary Table 26. The information of *M. lutarioriparius* NADP-MDH genes.**

| NADP-MDH           | CDSL (bp) | Exon num. | GL (bp) | Sb collinear gene       | GL (bp) | CDSL (bp) | Os collinear gene |
|--------------------|-----------|-----------|---------|-------------------------|---------|-----------|-------------------|
| MI13G009940        | 1,314     | 14        | 3,041   | Sobic.007G166200        | 3,354   | 1,308     | LOC_Os08g44810    |
| <b>MI07G037930</b> | 1,302     | 14        | 16,434  | <b>Sobic.007G166300</b> | 3,816   | 1,290     | LOC_Os08g44810    |
| <b>MI13G009930</b> | 1,302     | 14        | 3,378   | <b>Sobic.007G166300</b> | 3,816   | 1,290     | LOC_Os08g44810    |

CDSL: coding sequence length. GL: gene length. Sb: *Sorghum bicolor*. Os: *Oryza sativa*. Bold characters represent putative C<sub>4</sub> genes.

**Supplementary Table 27. The quality statistic of Hi-C data.**

| Item                          | Value         | Percent |
|-------------------------------|---------------|---------|
| Total read pairs processed    | 1,159,214,515 | 100.00% |
| Unmapped read pairs           | 24,633,679    | 2.13%   |
| Low quality read pairs        | 0             | 0.00%   |
| Unique paired alignments      | 50,949,808    | 43.95%  |
| Multiple paired alignments    | 49,628,487    | 42.81%  |
| Pairs with singleton          | 128,797,873   | 11.11%  |
| Low quality singleton         | 0             | 0.00%   |
| Unique singleton alignments   | 0             | 0.00%   |
| Multiple singleton alignments | 0             | 0.00%   |
| Reported pairs                | 509,498,087   | 43.95%  |

**Supplementary Table 28. Statistics of valid interaction read pairs in Hi-C data.**

| Item                        | Value       | Percent |
|-----------------------------|-------------|---------|
| Valid interaction pairs     | 371,731,170 | 32.07%  |
| Valid interaction rmdup     | 282,204,751 | 24.34%  |
| Trans interaction           | 187,647,612 | 16.19%  |
| Cis interaction             | 94,557,139  | 8.16%   |
| Cis short-range interaction | 37,614,554  | 3.24%   |
| Cis long-range interaction  | 56,942,585  | 4.91%   |

## **Supplementary Note 1. Evolution of C<sub>4</sub> photosynthesis genes in *M. lutarioriparius*.**

### **Carbonic anhydrase genes**

Ten Carbonic anhydrase (CA) genes were identified in *M. lutarioriparius* genome (**Supplementary Fig. 34, 35** and **Supplementary Table 20**), among which, eight CA genes are located in two tandem duplication blocks (**Supplementary Fig. 34a, b**). Based on sequence similarity and gene structure, MI05G027550/MI06G028470 was inferred to be derived from the fusion of two neighboring CA genes, which probably occurred before the recent whole genome duplication event (WGD) (**Supplementary Fig. 34c and 36**). To rule out the possibility that two neighboring CA genes were incorrectly annotated as one fused CA gene by gene prediction, transcriptome data of leaf sample was used to verify the gene fusion event. Transcriptome reads from leaf samples support the gene fusion event happened in CA gene family of *M. lutarioriparius* (**Supplementary Fig. 37**). MI04G024880 seem to be truncated compared with the homolog MI03G027080 (**Supplementary Fig. 35c, d**). Tandem duplication plays a critical role in the evolution of CA enzyme genes in *M. lutarioriparius*. Based on the phylogeny and genomic information (**Supplementary Fig. 34 and 38**), the CA enzyme genes in *M. lutarioriparius* were inferred to undergo four-time single gene duplication events, one-time gene fusion event and the recent WGD, which made 10 copies (**Supplementary Fig. 39**). An exon segmentation of MI05G027520 was probably occurred (**Supplementary Fig. 34c**). Transcriptome analysis showed that the four CA enzyme genes colinear with the sorghum C<sub>4</sub> CA genes had specific high expression in leaves, supporting these four gene probably be C<sub>4</sub> CA enzyme genes in *M. lutarioriparius* (**Supplementary Fig. 40**). Codon usages bias analysis showed that the four possible C<sub>4</sub> CA genes had high GC3s (84.6% ~ 86.2%) and low Nc (Effective number of codons), similar to that of sorghum C<sub>4</sub> CA genes (82.6% and 86.4%) (**Supplementary Fig. 40**).

### **Phosphoenolpyruvate carboxylase genes**

Twelve phosphoenolpyruvate carboxylase (PEPC) genes were identified in *M. lutarioriparius*, which is more than that of sorghum (6) (**Supplementary Table 21**). Besides the gene family expansion resulting from the recent WGD, segmental duplication event occurred after the WGD further expanded the PEPC gene family in *M. lutarioriparius* (**Supplementary Fig. 41**). Phylogenetic analysis suggested all *M. lutarioriparius* PEPC genes could be divided into six distinct groups, which is in consistent with previous study<sup>7</sup>. In *M. lutarioriparius*, two PEPC genes were predicted to encode bacteria-type enzymes and ten to encode plant-type enzymes (**Supplementary Fig. 42**). Transcriptome data showed that the two bacteria-type PEPC genes has no expression in the leaf and very low

expression in other samples. While MI18G021080 and MI19G017470 have specific high expression in the leaf and seedling (**Supplementary Fig. 43**). In addition, MI18G021080 and MI19G017470 both are collinear with sorghum C<sub>4</sub> PEPC gene Sobic.010G160700. Condon usage analysis revealed that MI18G021080 and MI19G017470 has relatively higher GC3s (81.3% and 82.4%) among all PEPC genes, which is similar to that of sorghum C<sub>4</sub> PEPC. Combined with the above information, we inferred that MI18G021080 and MI19G017470 were the functional C<sub>4</sub> PEPC genes in *M. lutarioriparius*.

### **Phosphoenolpyruvate carboxylase kinase**

Phosphoenolpyruvate carboxylase kinase (PPCK) is responsible for the phosphorylation of leaf PEPC during C<sub>4</sub> photosynthesis<sup>8</sup>. There were six PPCK genes identified in *M. lutarioriparius* (**Supplementary Table 22**). One tandem duplication of PPCK genes further expanded the PPCK gene family in *M. lutarioriparius* (**Supplementary Fig. 44a**). PPCK genes of *M. lutarioriparius*, rice and sorghum all have high GC3s (>91%) (**Supplementary Fig. 44b**). Transcriptome analysis suggested the putative C<sub>4</sub> PPCK genes MI07G003010 and MI08G002780 had specific high expression in leaf compared with other samples (**Supplementary Fig. 44b**). Phylogenetic analysis indicated the differentiation of C<sub>4</sub> and non-C<sub>4</sub> isoform PPCK probably occurred before species divergence among grass (**Supplementary Fig. 44c**). PPCK gene family probably suffer the purify selection due to the important function in C<sub>4</sub> photosynthesis (**Supplementary Fig. 44d**).

### **Pyruvate phosphate dikinase genes**

Three genes coding pyruvate phosphate dikinase (PPDK) were identified in *M. lutarioriparius* genome (**Supplementary Table 23**). MI16G016970 and MI17G017350 both are collinear with the sorghum C<sub>4</sub> PPDK gene Sobic.009G132900<sup>9</sup>. And phylogenetic analysis revealed that putative C<sub>4</sub> isoform PPDK genes of *M. lutarioriparius* and sorghum were grouped in the same cluster (**Supplementary Fig. 45a**). Two C<sub>4</sub> isoform *M. lutarioriparius* PPDK genes both showed specific high expression in leaf and seedling compared to other samples (**Supplementary Fig. 45b**).

### **Pyruvate phosphate dikinase regulatory protein genes**

Totally six pyruvate phosphate dikinase regulatory protein (PPDK-RP) genes were identified in *M. lutarioriparius*, among which, four are tandem duplicates (**Supplementary Table 24**). Based on the collinearity with sorghum C<sub>4</sub> PPDK-RP gene, three putative C<sub>4</sub> PPDK-RP genes of *M. lutarioriparius* were characterized. Transcriptome analysis revealed these three putative C<sub>4</sub> PPDK-RP genes highly expressed in leaf sample compared to other samples (**Supplementary Fig. 46e**). Based on the collinearity relationship of *M. lutarioriparius*, sorghum and rice, the tandem duplications of PPDK-RP genes were

inferred to be occurred before the species divergence between *M. lutarioriparius* and sorghum (**Supplementary Fig. 46a**). Combining phylogenetic analysis, gene structure and sequence similarity (**Supplementary Fig. 46a, b, c, d**), PPK-RP genes in *M. lutarioriparius* were inferred to undergo two-time gene duplications and one-time gene fission event (**Supplementary Fig. 46f**). Function domain annotation indicated that MI03G014630 and MI03G014650 both had partial kinase-PPPase domain (**Supplementary Fig. 47**).

### **NADP-malic enzyme genes**

We identified 13 NADP-malic enzyme (NADP-ME) genes in *M. lutarioriparius* (**Supplementary Table 25** and **Supplementary Fig. 48e**). The duplications of *M. lutarioriparius* NADP-ME occurred before and after it split with sorghum, leading to the expansion of size of NADP-ME gene family in *M. lutarioriparius* (**Supplementary Fig. 48a, b and c**). Transcriptome data showed that the putative C<sub>4</sub> NADP-ME genes in *M. lutarioriparius* had specific high expression in leaf compared to other samples (**Supplementary Fig. 48d**).

### **NADP-malate dehydrogenase genes**

There exist two NADP-malate dehydrogenase (NADP-MDH) genes in sorghum genome, one is C<sub>4</sub> gene, the other is non-C<sub>4</sub> isoform gene. A total of three NADP-MDH genes of *M. lutarioriparius* were identified using homolog search (**Supplementary Table 26**). Based on the collinearity analysis, it was speculated that the tandem duplication of NADP-MDH genes of sorghum might occur after the species differentiation of sorghum and rice, but before the species differentiation of *M. lutarioriparius* and sorghum. Therefore, the tandem duplication of NADP-MDH gene was also observed in *M. lutarioriparius* genome. One copy of *M. lutarioriparius* NADP-MDH gene probably be lost after the recent WGD (**Supplementary Fig. 49a, b**). The results of subcellular localization prediction showed that the productions of three NADP-MDH genes were located in chloroplast. Transcriptome data analysis revealed that these three genes were all highly expressed in leaf tissues (**Supplementary Fig. 49d**). MI07G037930 and MI13G009940, which were collinear with the sorghum C<sub>4</sub> NADP-MDH gene, had higher expression levels than MI13G009940, supporting MI07G037930 and MI13G009930 as potential C<sub>4</sub> NADP-MDH genes of *M. lutarioriparius* (**Supplementary Fig. 49d**). The analysis of codon usage revealed that similar GC3s (46.3%~49.8%) among *M. lutarioriparius* NADP-MDH genes and homologous genes of sorghum and rice.

### **RbBPCase small-subunit genes**

The Localization of Rubisco in C<sub>4</sub> plant vascular sheath depends on the RbBPCase small-

subunit (RbcS) genes. Homologous genes were retrieved from the genome of *M. lutariroriparius* by using the known sorghum RbcS gene Sobic.005G042000, and two *M. lutariroriparius* RbcS genes were identified (**Supplementary Fig. 50a, b**). Codon analysis showed high GC3s of two RbcS genes (96.3% and 97.5%), similar to sorghum homologous gene Sobic.005G042000 (97.5%) (**Supplementary Fig. 50c**). Transcriptome data analysis revealed that both genes were expressed in leaves, but the expression level of MI09G046990 gene in leaves was much higher than that of MI10G055410, indicating that MI09G046990 probably the gene mainly performing photosynthesis-related functions (**Supplementary Fig. 50c**).

## Supplementary references

1. Wang, Y. *et al.* MCScanX: a toolkit for detection and evolutionary analysis of gene synteny and collinearity. *Nucleic Acids Res.* **40**, e49-e49 (2012).
2. Benjamini, Y. & Hochberg, Y. Controlling the false discovery rate: a practical and powerful approach to multiple testing. *J. R. Stat. Soc. Ser. B* **57**, 289-300 (1995).
3. Pinard, D. *et al.* Comparative analysis of plant carbohydrate active enzymes and their role in xylogenesis. *BMC Genomics* **16**, 402 (2015).
4. Katoh, K. & Standley, D. M. MAFFT multiple sequence alignment software version 7: Improvements in performance and usability. *Mol. Biol. Evol.* **30**, 772-780 (2013).
5. Kumar, S., Stecher, G., Li, M., Knyaz, C. & Tamura, K. MEGA X: molecular evolutionary genetics analysis across computing platforms. *Mol. Biol. Evol.* **35**, 1547-1549 (2018).
6. Wang, X. *et al.* Comparative genomic analysis of C4 photosynthetic pathway evolution in grasses. *Genome Biol.* **10**, R68 (2009).
7. Sánchez, R. & Cejudo, F. J. Identification and expression analysis of a gene encoding a bacterial-type phosphoenolpyruvate carboxylase from *Arabidopsis* and Rice. *Plant Physiol.* **132**, 949-957 (2003).
8. Aldous, S. H. *et al.* Evolution of the phosphoenolpyruvate carboxylase protein kinase family in C3 and C4 *Flaveria* spp. *Plant Physiol.* **165**, 1076-1091 (2014).
9. Paterson, A. H. *et al.* The *sorghum bicolor* genome and the diversification of grasses. *Nature* **457**, 551-556 (2009).
